# Supplementary material
Source: PubMed Central journal article supplement (PMC2898275)
Supplement: NIHMS202682-supplement-supp1.pdf [file NIHMS202682-supplement-supp1.pdf]

# Supporting Information

## $\alpha,\beta$ -Methylene-2'-deoxynucleoside 5'-triphosphates as non-cleavable substrates for DNA polymerases: Isolation, characterization, and stability studies of novel 2'-deoxycyclonucleosides, 3,5'-anhydro-dG and 2,5'-anhydro-dT

Fengting Liang, Nidhi Jain, Troy Hutchens, David D. Shock, William A. Beard, Samuel H. Wilson, M. Paul Chiarelli, and Bongsup P. Cho\*

**Figure S1:**  $^1\text{H}$  NMR spectrum of 5',3'-*O*-bis-*tert*-butyl-dimethylsilyl-dG recorded in DMSO- $d_6$

**Figure S1:**  $^1\text{H}$  NMR spectrum of 5',3'-*O*-bis-*tert*-butyl-dimethylsilyl-dG recorded in DMSO- $d_6$

**Figure S3:**  $^1\text{H}$  NMR spectrum of 5'-*O*-Tosyl-3'-*O*-*tert*-butyl-dimethylsilyl-dG recorded in DMSO- $d_6$

**Figure S4:**  $^1\text{H}$  NMR spectrum of 5'-*O*-Tosyl-dG (**4**) recorded in DMSO- $d_6$

**Figure S5:**  $^{31}\text{P}$  NMR spectrum of  $\alpha,\beta$ -methylene-dATP (**12**) recorded in D $_2$ O.

**Figure S6:**  $^{31}\text{P}$  NMR spectrum of  $\alpha,\beta$ -methylene-dCTP (**13**) recorded in D $_2$ O.

**Figure S7:**  $^{31}\text{P}$  NMR spectrum of  $\alpha,\beta$ -methylene-dGTP (**15**) recorded in D $_2$ O.

**Figure S8:**  $^{31}\text{P}$  NMR spectrum of  $\alpha,\beta$ -methylene-dTTP (**14**) recorded in D $_2$ O.

**Figure S9:** Negative ion ESI-LTQ-FTMS high resolution mass spectrum of  $\alpha,\beta$ -methylene-dGTP (**15**). The theoretical mass of the (M-H) $^-$  ion is 504.0087. The measured mass is 504.0092.

**Figure S10:** Negative ion ESI-LTQ-FTMS high resolution mass spectrum of  $\alpha,\beta$ -methylene-dCTP (**13**). The theoretical mass of the (M-H) $^-$  ion is 464.0025. The measured mass is 464.0032.

**Figure S11:** Negative ion ESI-LTQ-FTMS high resolution mass spectrum of  $\alpha,\beta$ -methylene-dTTP (**14**). The theoretical mass of the (M-H) $^-$  ion is 479.0022. The measured mass is 479.0028.

**Figure S12:** Negative ion ESI-LTQ-FTMS high resolution mass spectrum of  $\alpha,\beta$ -methylene-dATP(**12**). The theoretical mass of the (M-H) $^-$  ion is 488.0137. The measured mass is 488.0143.

**Figure S13:**  $^1\text{H}$  NMR spectrum of cyclo-dG (**16**) recorded in (a) DMSO- $d_6$  and with D $_2$ O added.

**Figure S14:**  $^1\text{H}$  NMR spectrum of cyclo-dT (**17**) recorded in D $_2$ O.

**Figure S15.** Comparison of  $^1\text{H}$  NMR spectra of  $\alpha,\beta$ -methylene-dGDP (**11**) and cyclo-dG (**16**) recorded in DMSO- $d_6$ .

## S2

**Figure S16.** TOCSY <sup>1</sup>H NMR spectrum of cyclo-dG (**16**) recorded in DMSO-d<sub>6</sub>.

**Figure S17.** NOSEY <sup>1</sup>H NMR spectrum of cyclo-dT(**17**) recorded in DMSO-d<sub>6</sub>. The cross-peaks circled in red indicate the close proximity of the H6 and H1' protons (i.e., *syn*-glycosidyl conformation).

**Figure S18.** Comparison of <sup>13</sup>C NMR of dT and Cyclo-dT (**17**) recorded in DMSO-d<sub>6</sub>.

**Figure S19.** Comparison of UV of (a)  $\alpha,\beta$ -methylene-dGDP (**11**)(green) and cyclo-dG (**16**) (blue); (b)  $\alpha,\beta$ -methylene-dTDP (**10**)(green) and cyclo-dT (**17**)(blue).

**Figure S20.** The CD spectra of cyclo-dG (**16**) as a function of time (0 - 6 h) every hour at 90 °C in comparison with dG (dotted blue lines).

**Figure S21.** The CD spectra of cyclo-dT (**17**) as a function of time (0- 6 h) at 90 °C in comparison with dT (dotted blue lines).

**Figure S22.** pH dependence UV spectra of dG.

**Figure S23.** pH dependence UV spectra of cyclo-dG (**16**).

**Figure S24.** pH dependence CD spectra of cyclo-dG (**16**).

**Figure S25.** pH dependence UV spectra of dT.

**Figure S26.** pH dependence UV spectra of cyclo-dT(**17**).

**Figure S27.** pH dependence CD spectra of **18**.

**Figure S28.** pH dependence UV spectra of **18**.

**Figure S29.** <sup>1</sup>H NMR spectrum of **18** in DMSO-d<sub>6</sub>.

**Figure S30.** <sup>1</sup>H NMR spectrum of **18** in DMSO-d<sub>6</sub> + D<sub>2</sub>O.

**Figure S31.** <sup>13</sup>C NMR spectrum of **18** in D<sub>2</sub>O.

**Figure S32.** pH dependence CD spectra of cyclo-dX (**19**).

**Figure S33.** pH dependence UV spectra of cyclo-dX (**19**).

**Figure S34.** <sup>1</sup>H NMR spectrum of cyclo-dX (**19**) in DMSO-d<sub>6</sub>.

**Figure S36.** <sup>13</sup>C NMR spectrum of cyclo-dX (**19**) in DMSO-d<sub>6</sub>.

**Figure S37.** NOESY NMR spectrum of cyclo-dX (**19**) in DMSO-d<sub>6</sub>.

# S3

**Figure S38.** Cyclo-dX (**19**). The product ion spectrum of the (M+H)<sup>+</sup> ion acquired with LTQ-FTMS.

**Figure S39.** Comparison of UV of cyclo-dG (blue), acid intermediate **18** (pink), and cyclo-dX (**19**)(green).



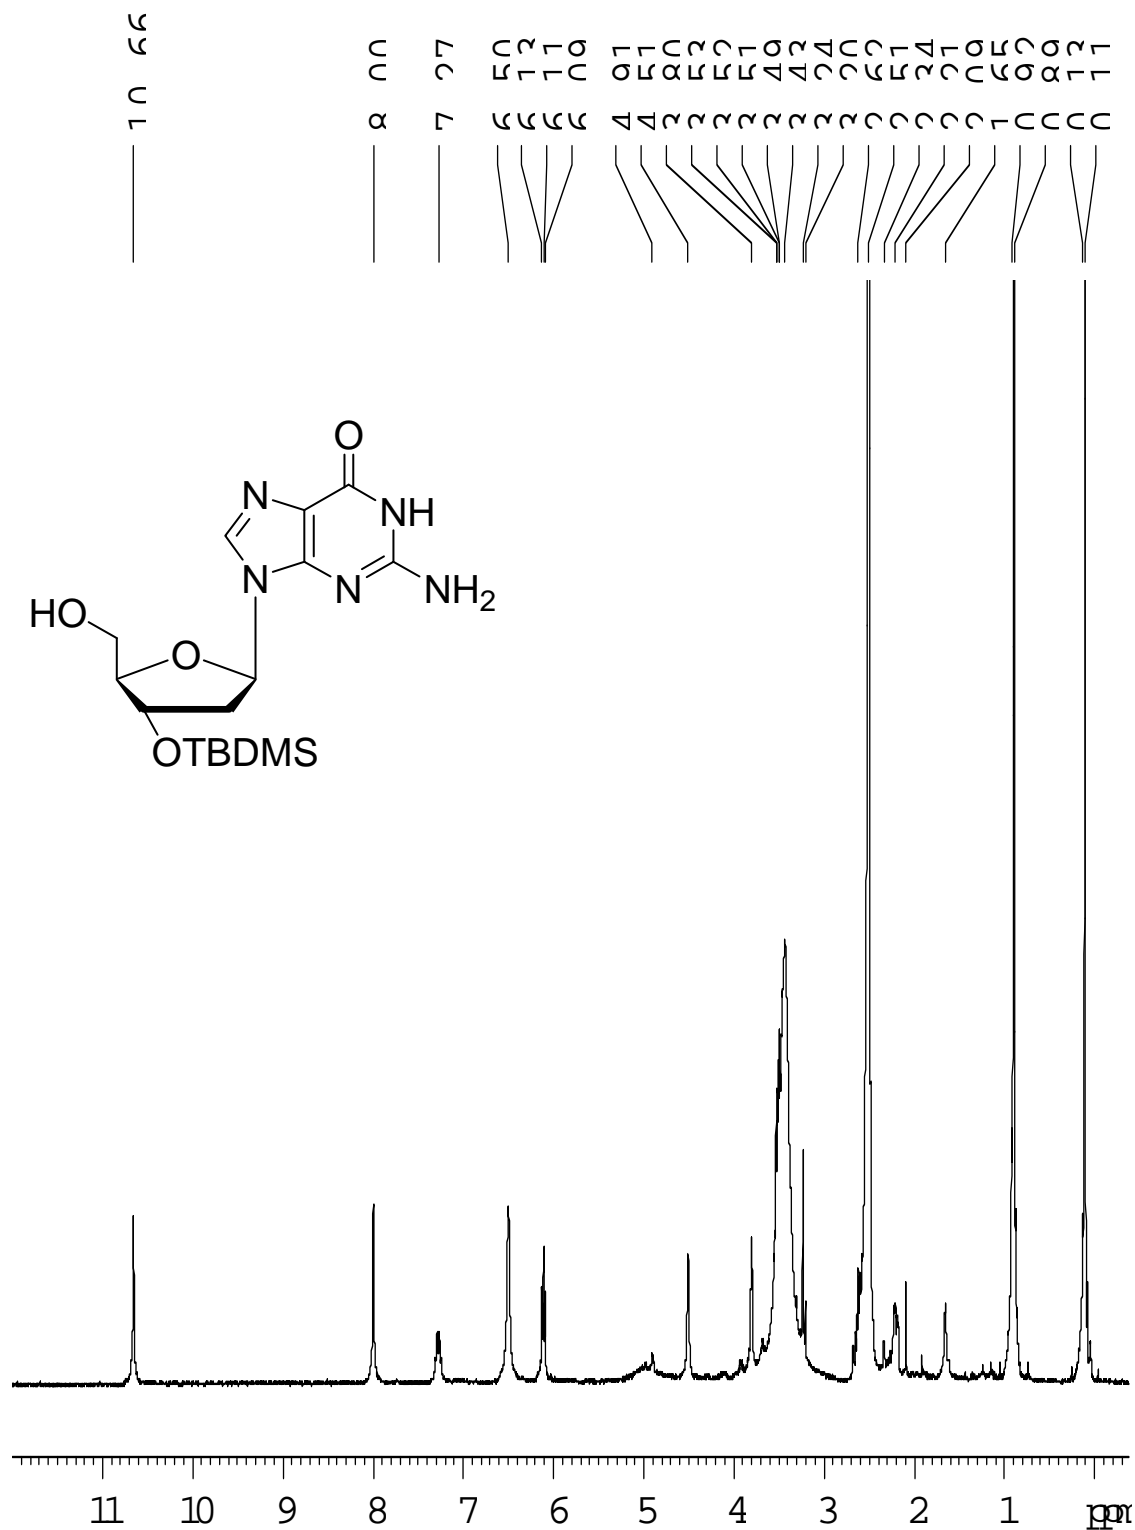

**Figure S2:** <sup>1</sup>H NMR spectrum of 3'-O-*tert*-butyl-dimethylsilyl-dG recorded in DMSO-d<sub>6</sub>

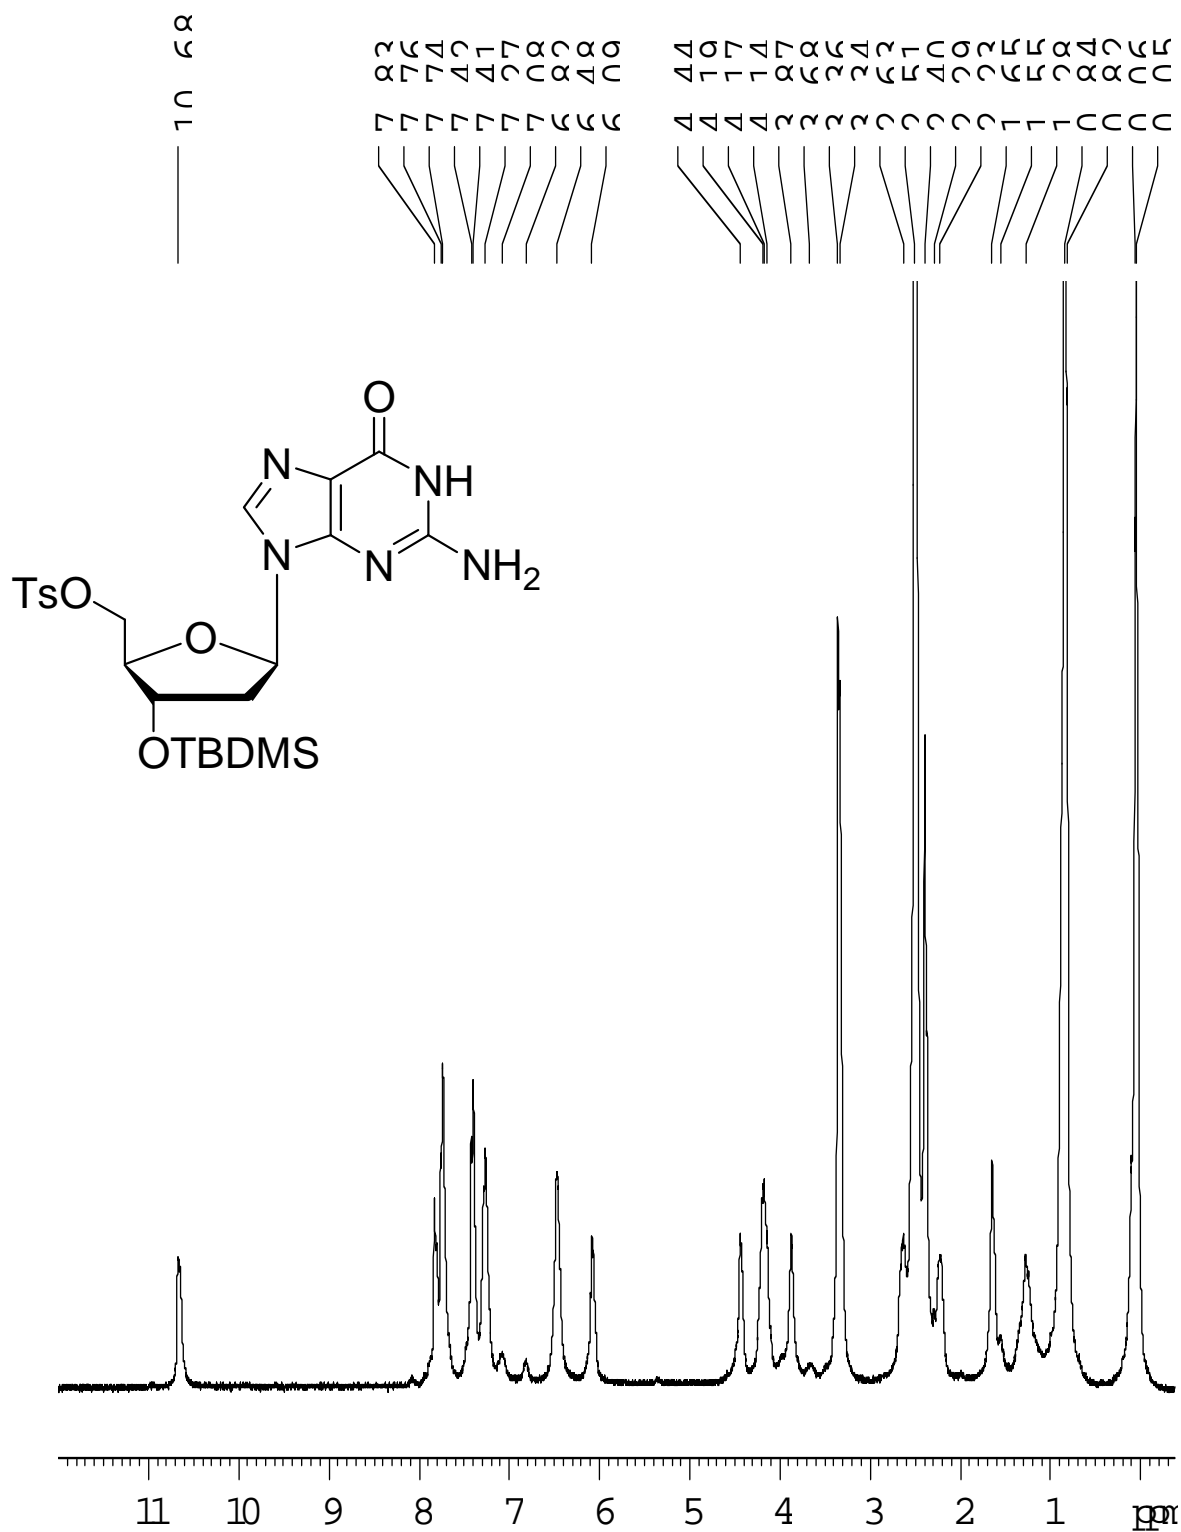

Figure S3: <sup>1</sup>H NMR spectrum of 5'-O-Tosyl-3'-O-*tert*-butyl-dimethylsilyl-dG recorded in DMSO-d<sub>6</sub>

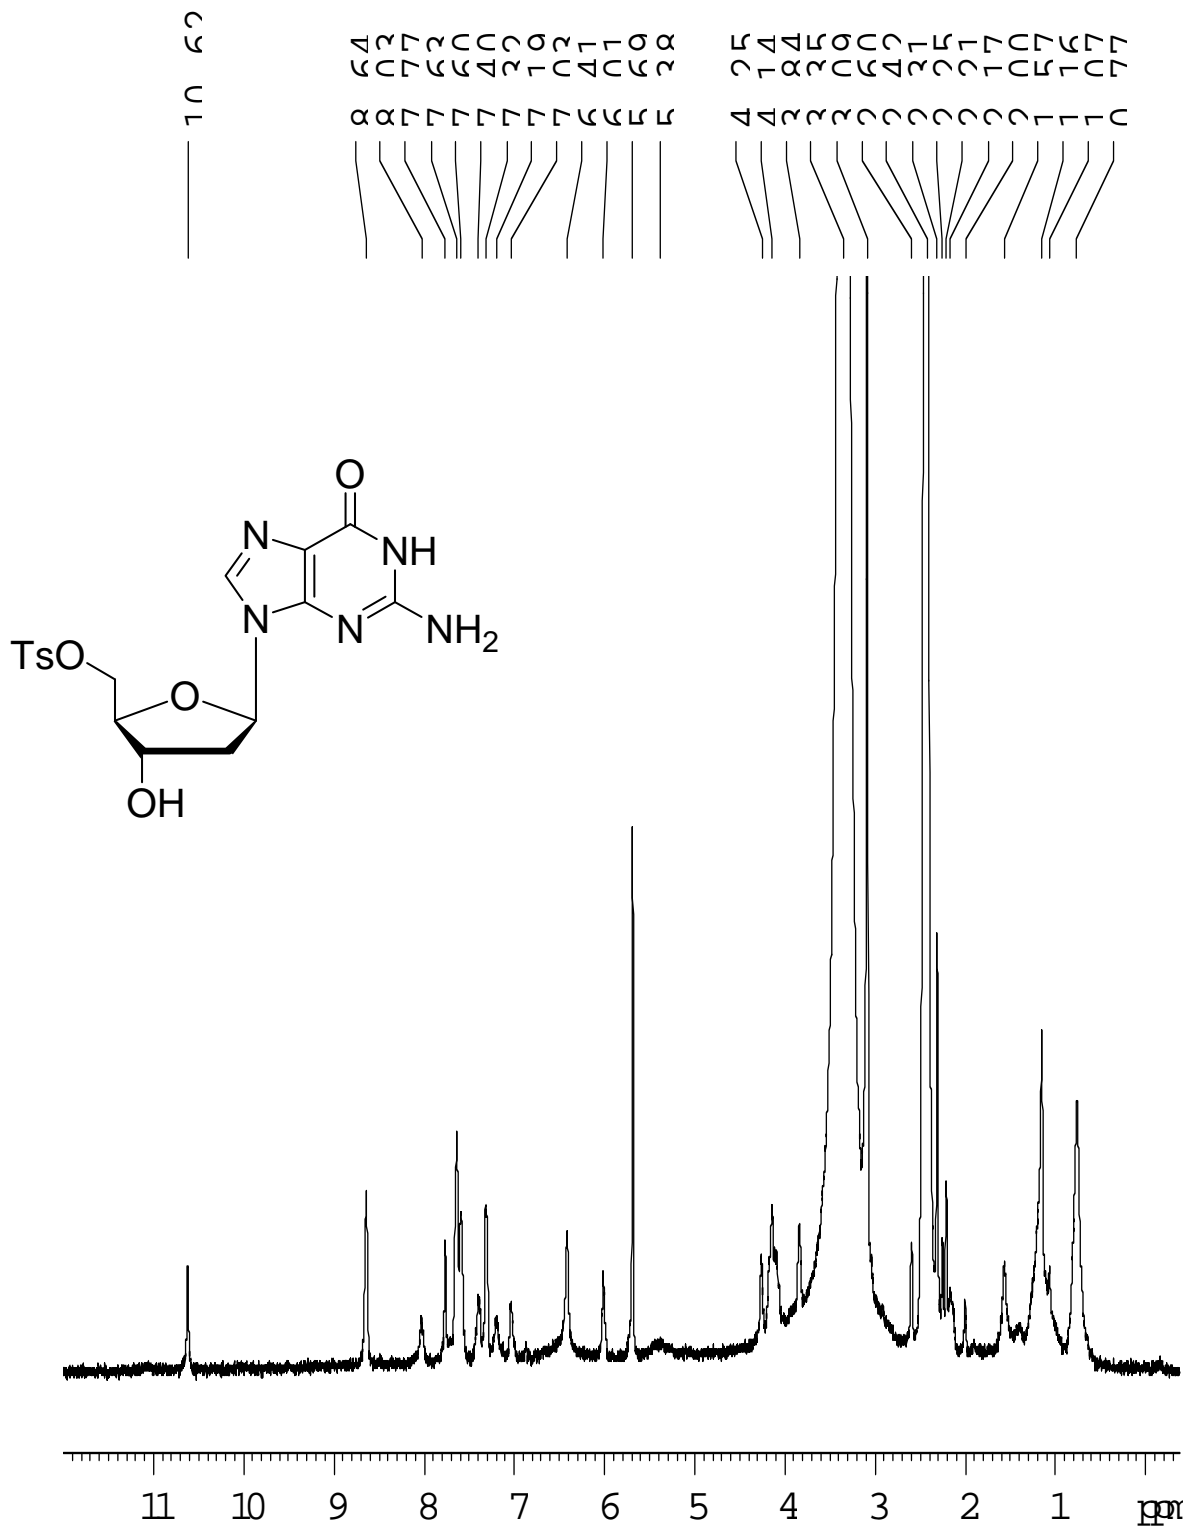

**Figure S4:** <sup>1</sup>H NMR spectrum of 5'-O-Tosyl-dG (**4**) recorded in DMSO-d<sub>6</sub>

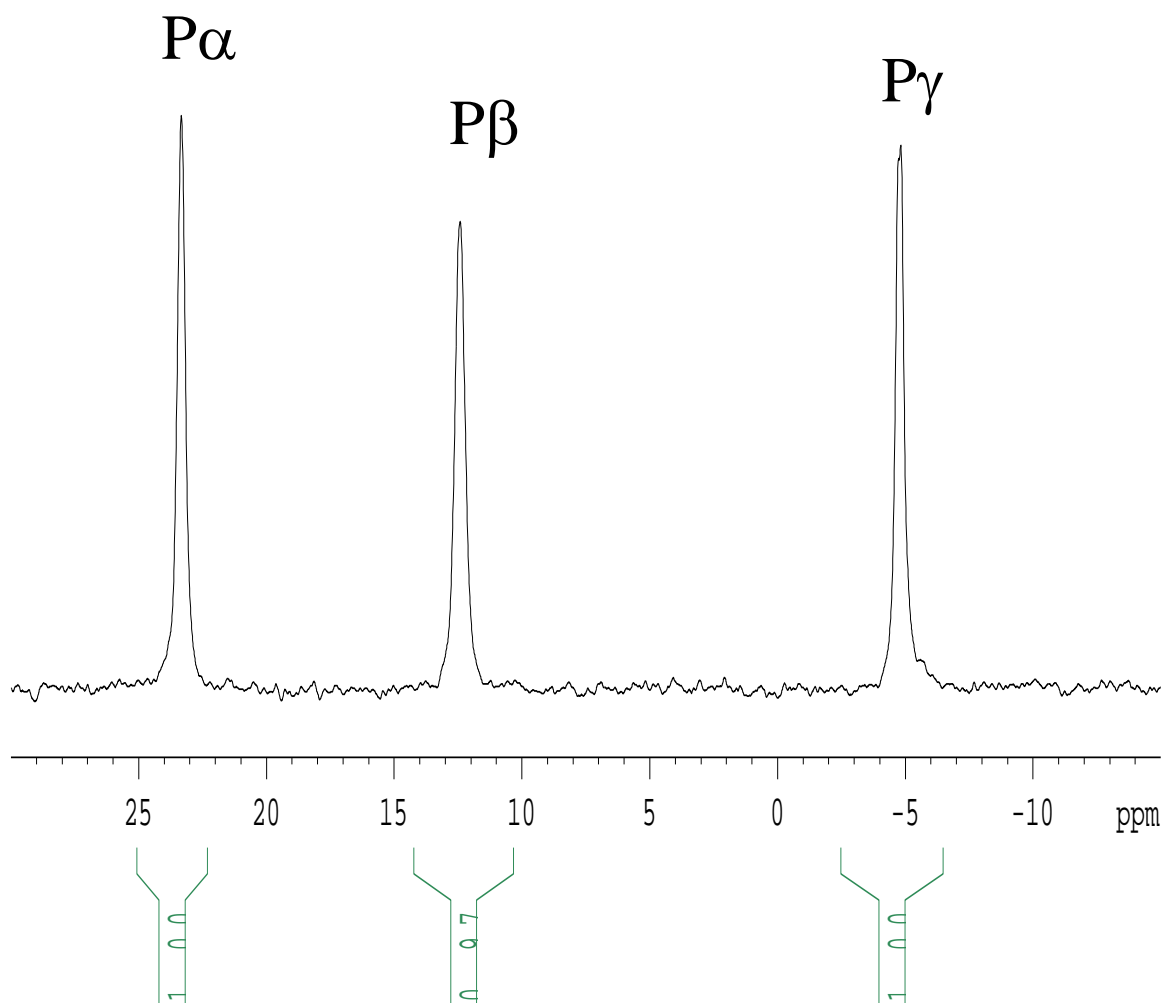

**Figure S5:**  $^{31}\text{P}$  NMR spectrum of  $\alpha,\beta$ -methylene-dATP (**12**) recorded in  $\text{D}_2\text{O}$ .



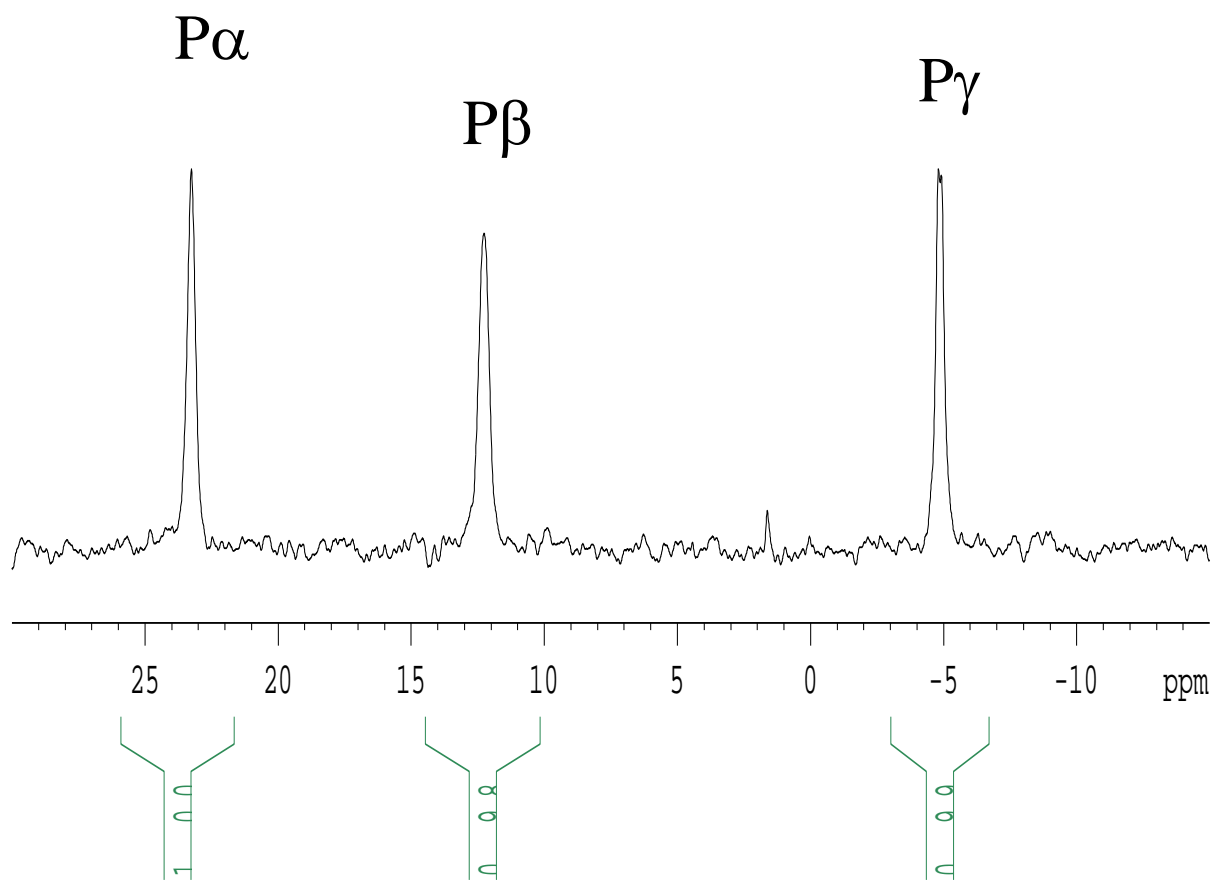

**Figure S6:**  $^{31}\text{P}$  NMR spectrum of  $\alpha,\beta$ -methylene-dCTP (**13**) recorded in  $\text{D}_2\text{O}$ .

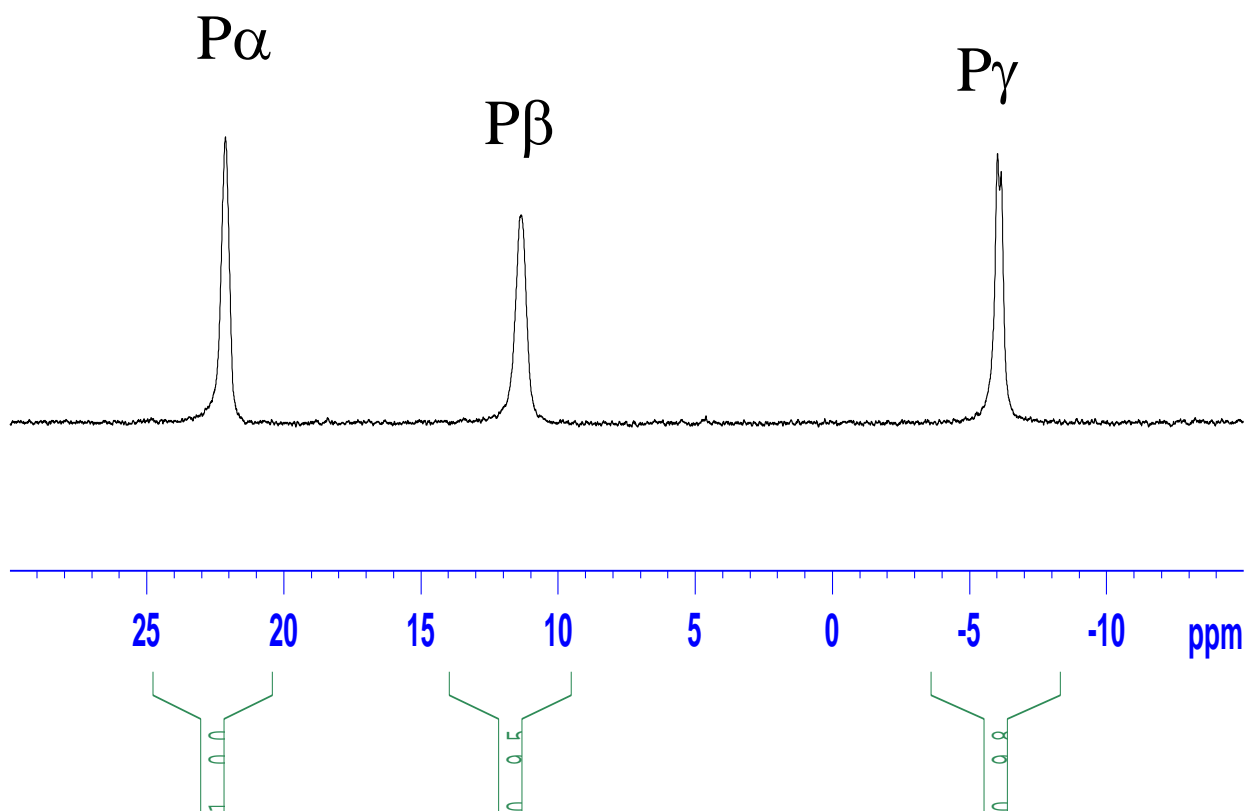

**Figure S7:**  $^{31}\text{P}$  NMR spectrum of  $\alpha,\beta$ -methylene-dGTP (15) recorded in  $\text{D}_2\text{O}$ .

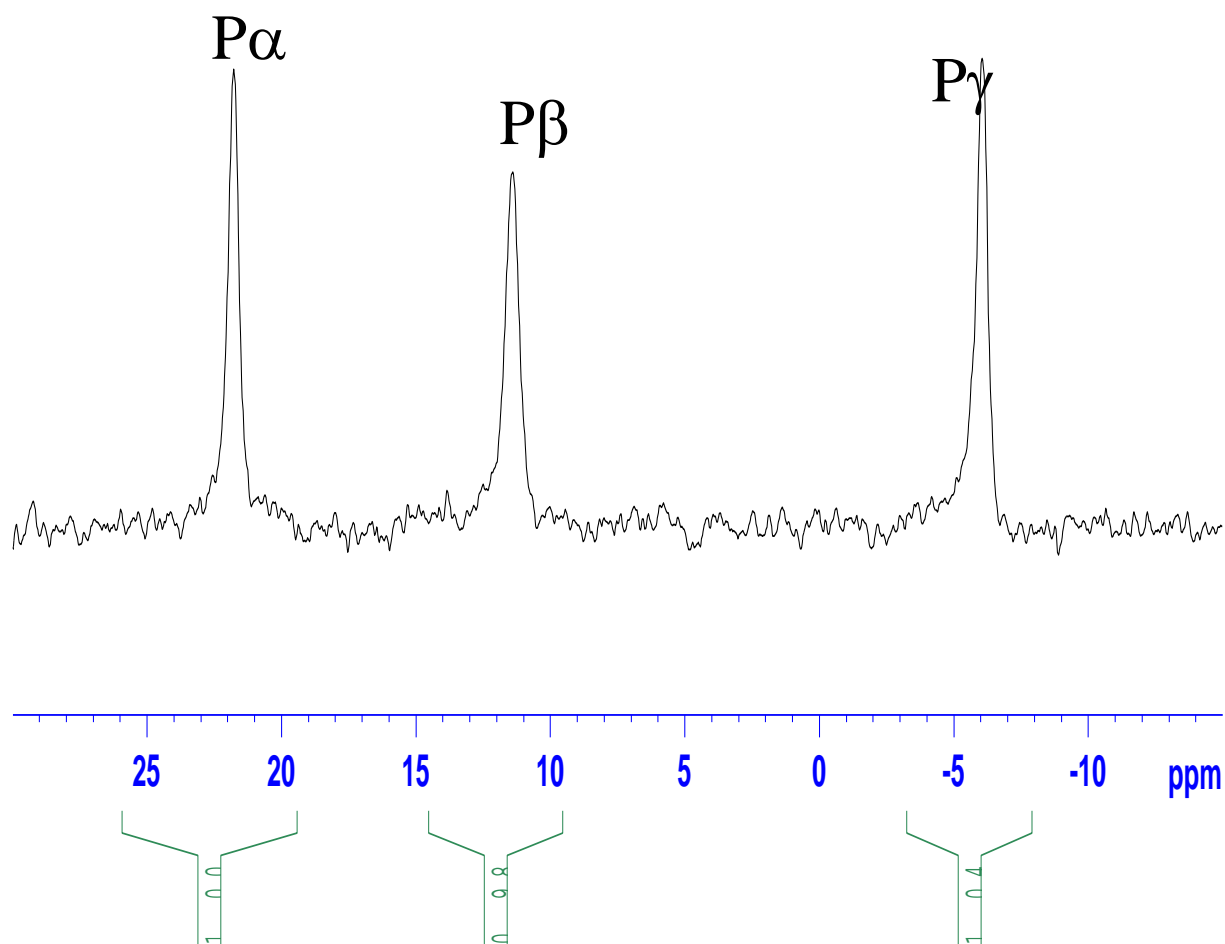

**Figure S8:**  $^{31}\text{P}$  NMR spectrum of  $\alpha,\beta$ -methylene-dTTP (**14**) recorded in  $\text{D}_2\text{O}$ .

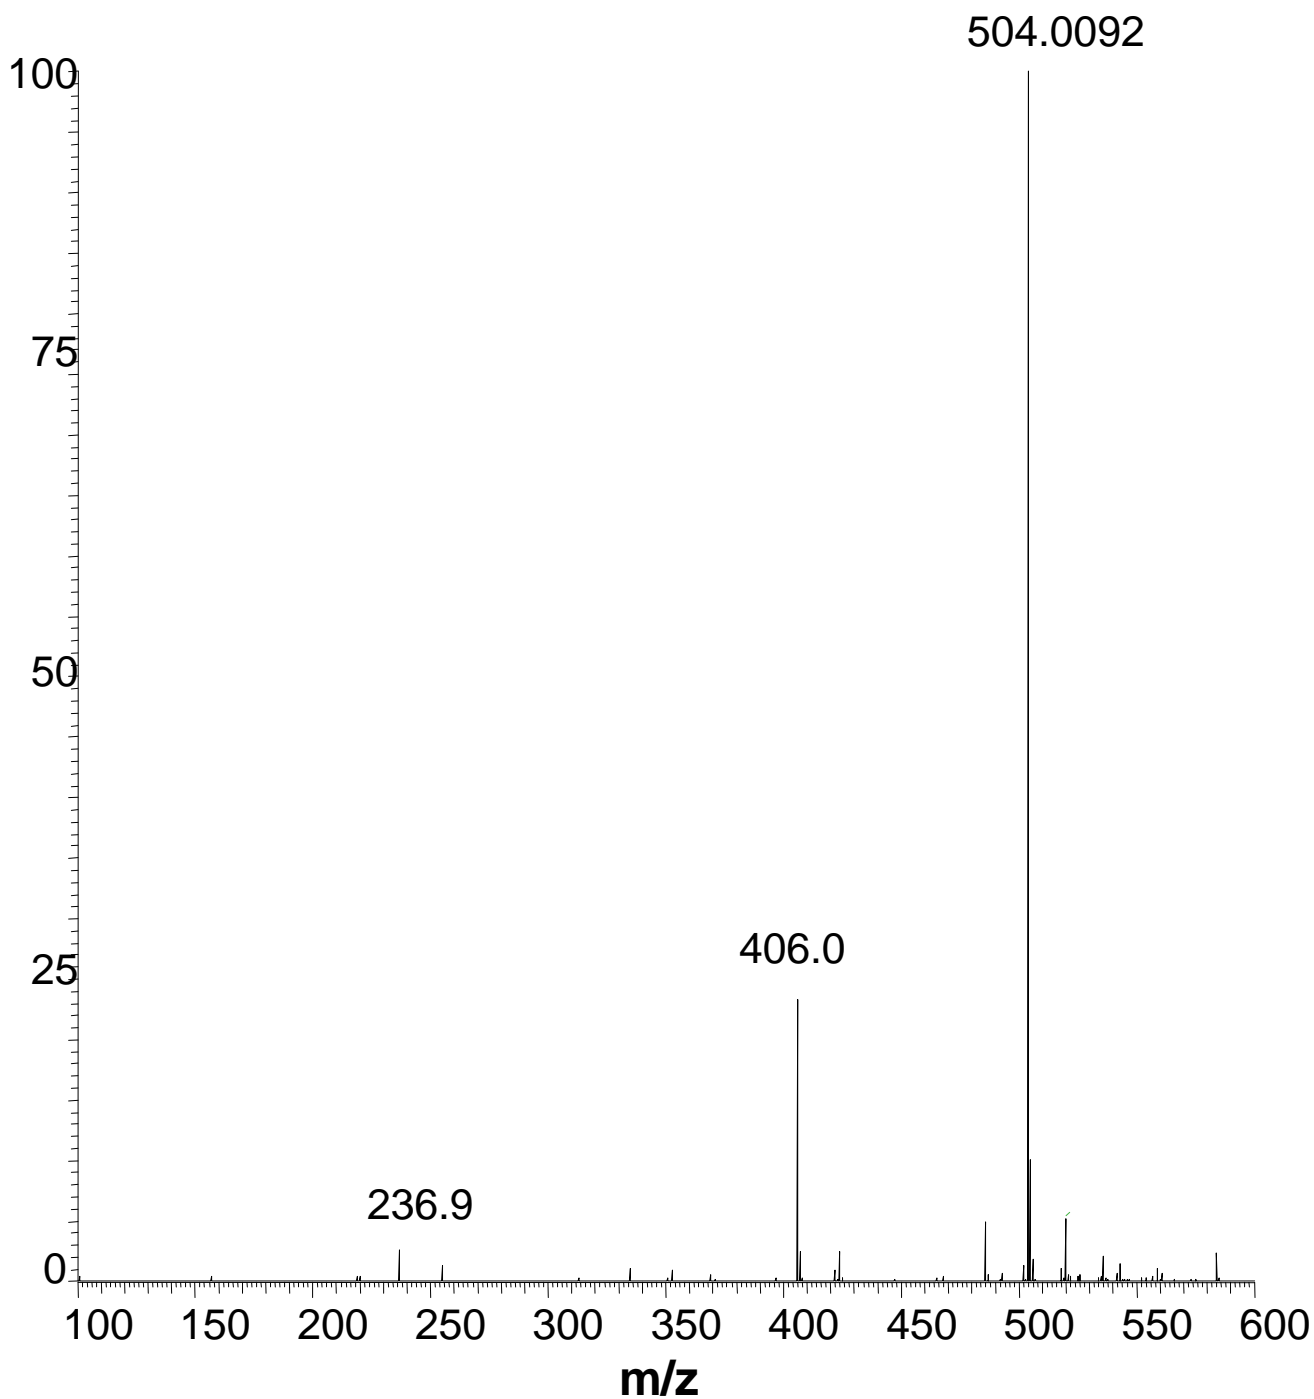

**Figure S9:** Negative ion ESI-LTQ-FTMS high resolution mass spectrum of  $\alpha,\beta$ -methylene-dGTP (**15**). The theoretical mass of the  $(M-H)^-$  ion is 504.0087. The measured mass is 504.0092

S13

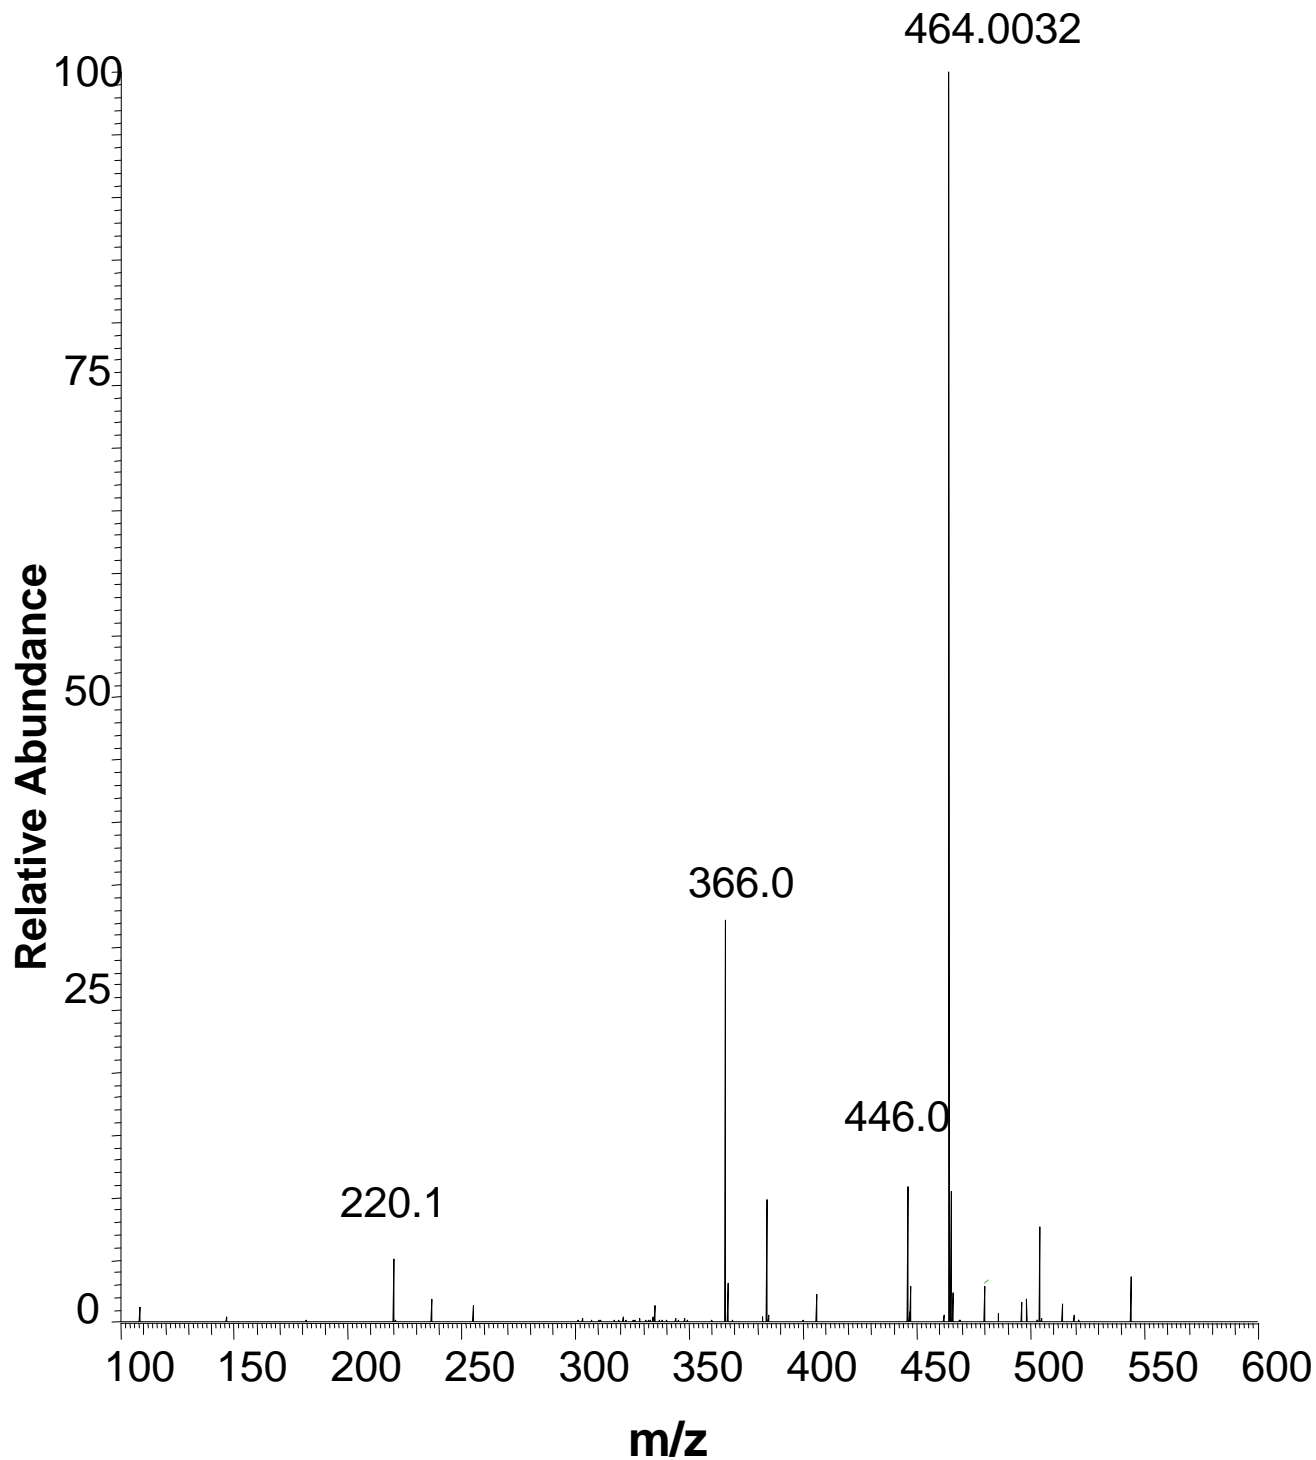

**Figure S10:** Negative ion ESI-LTQ-FTMS high resolution mass spectrum of  $\alpha,\beta$ -methylene-dCTP (**13**). The theoretical mass of the  $(M-H)^-$  ion is 464.0025. The measured mass is 464.0032.

**S14**

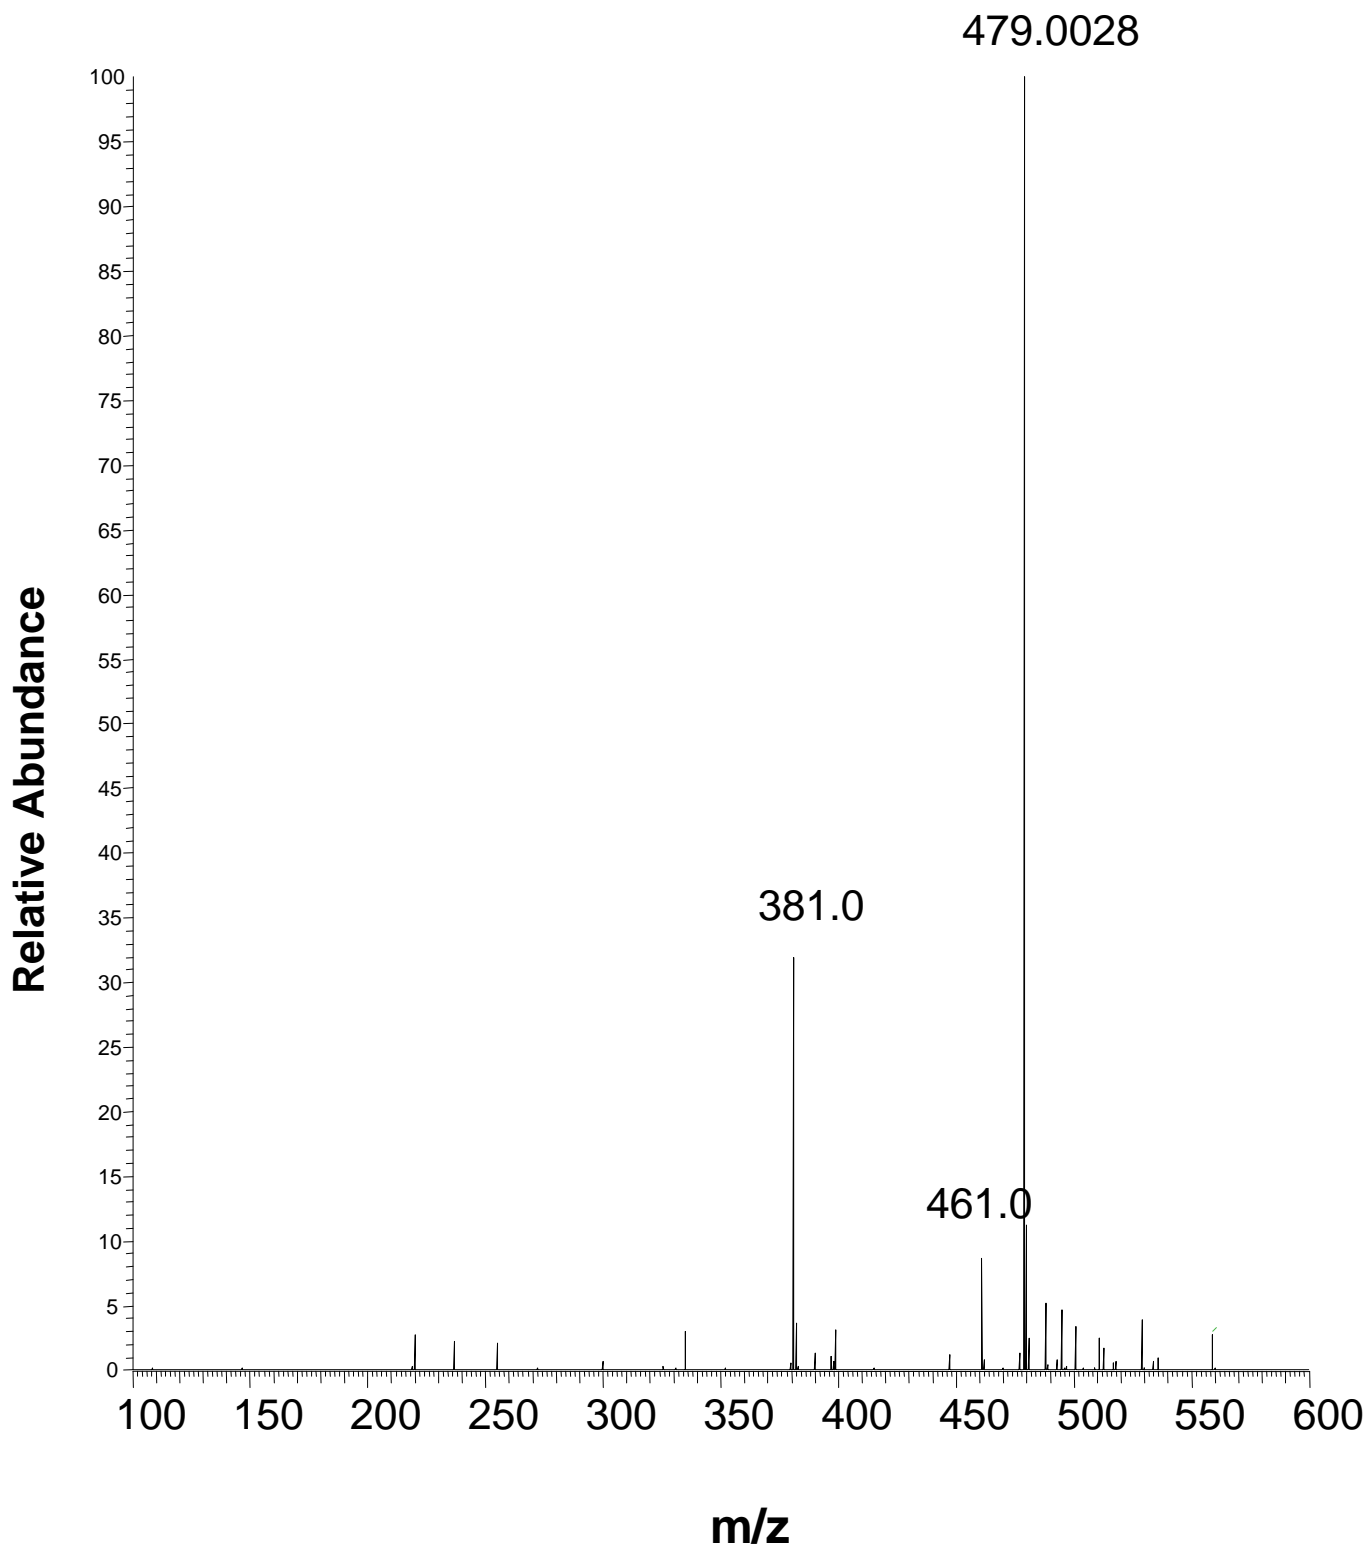

**Figure S11:** Negative ion ESI-LTQ-FTMS high resolution mass spectrum of  $\alpha,\beta$ -methylene-dTTP (**14**). The theoretical mass of the  $(M-H)^-$  ion is 479.0022. The measured mass is 479.0028.

**S15**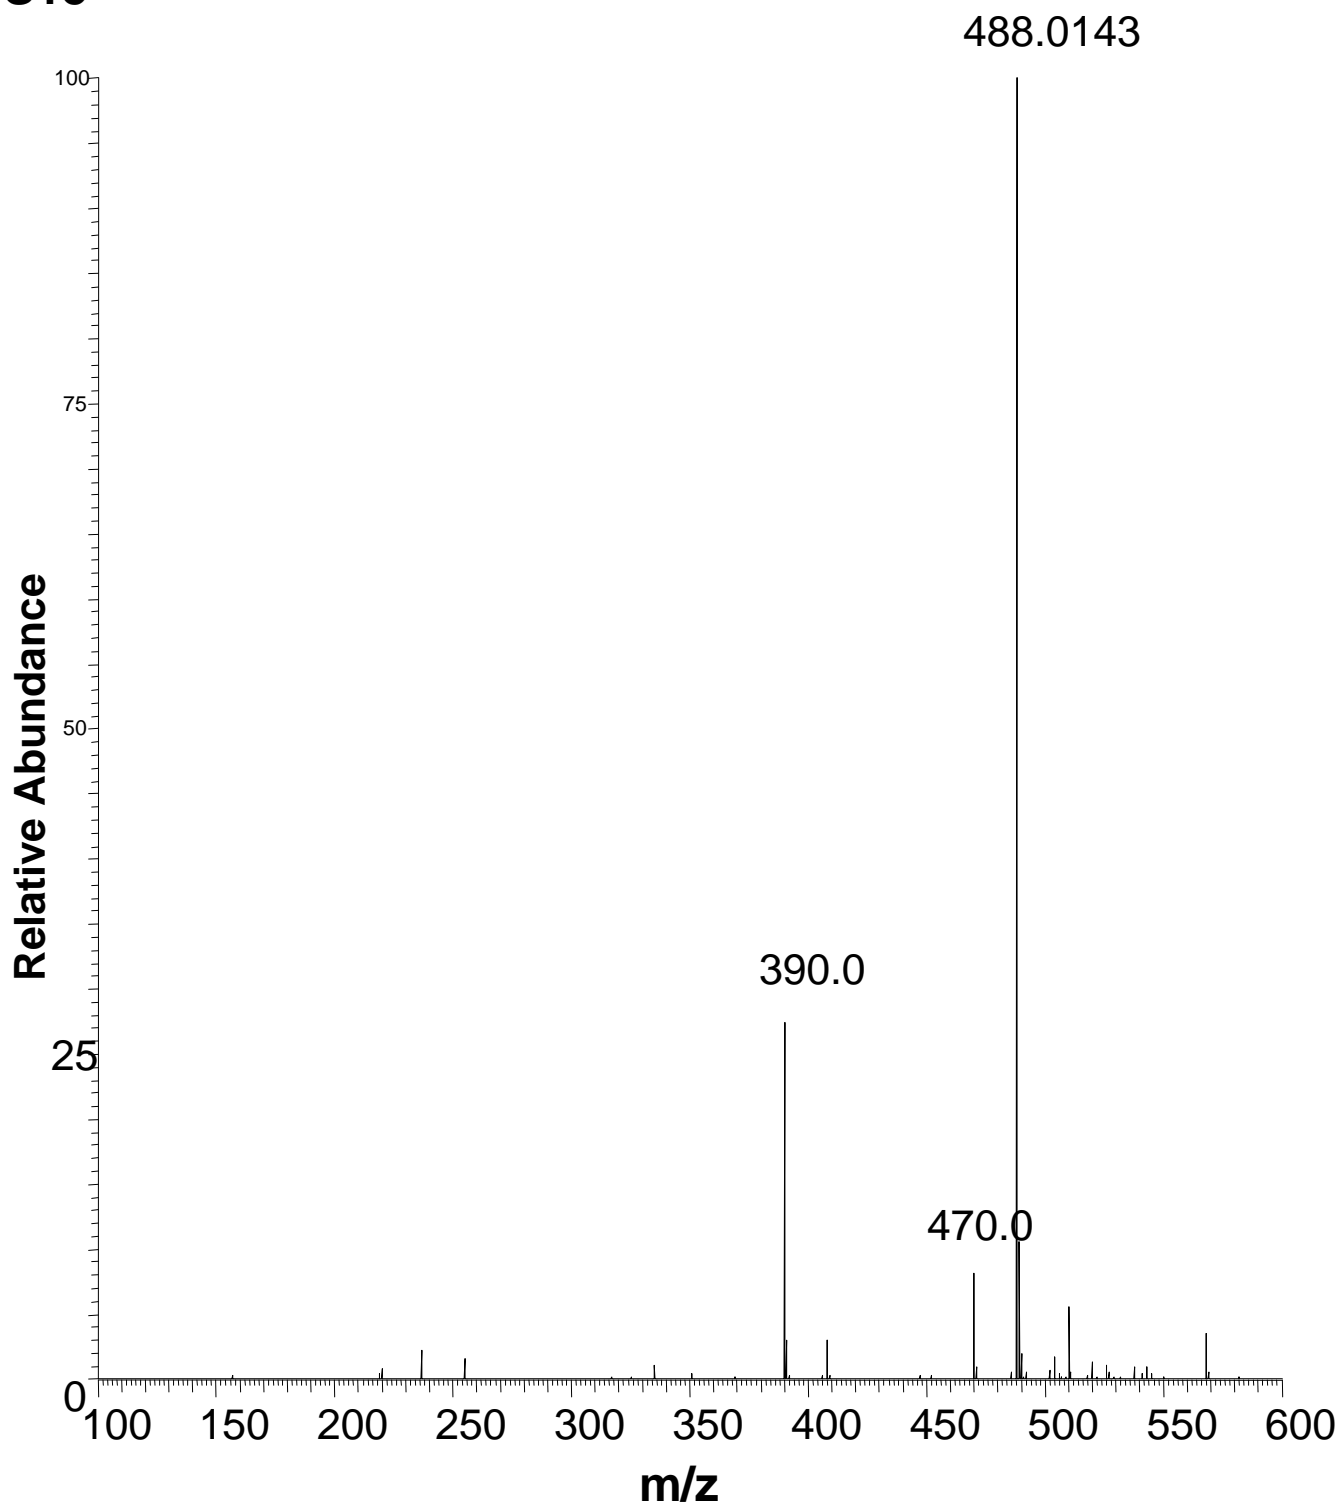

**Figure S12:** Negative ion ESI-LTQ-FTMS high resolution mass spectrum of  $\alpha,\beta$ -methylene-dATP(**12**). The theoretical mass of the  $(M-H)^-$  ion is 488.0137. The measured mass is 488.0143.

**S16**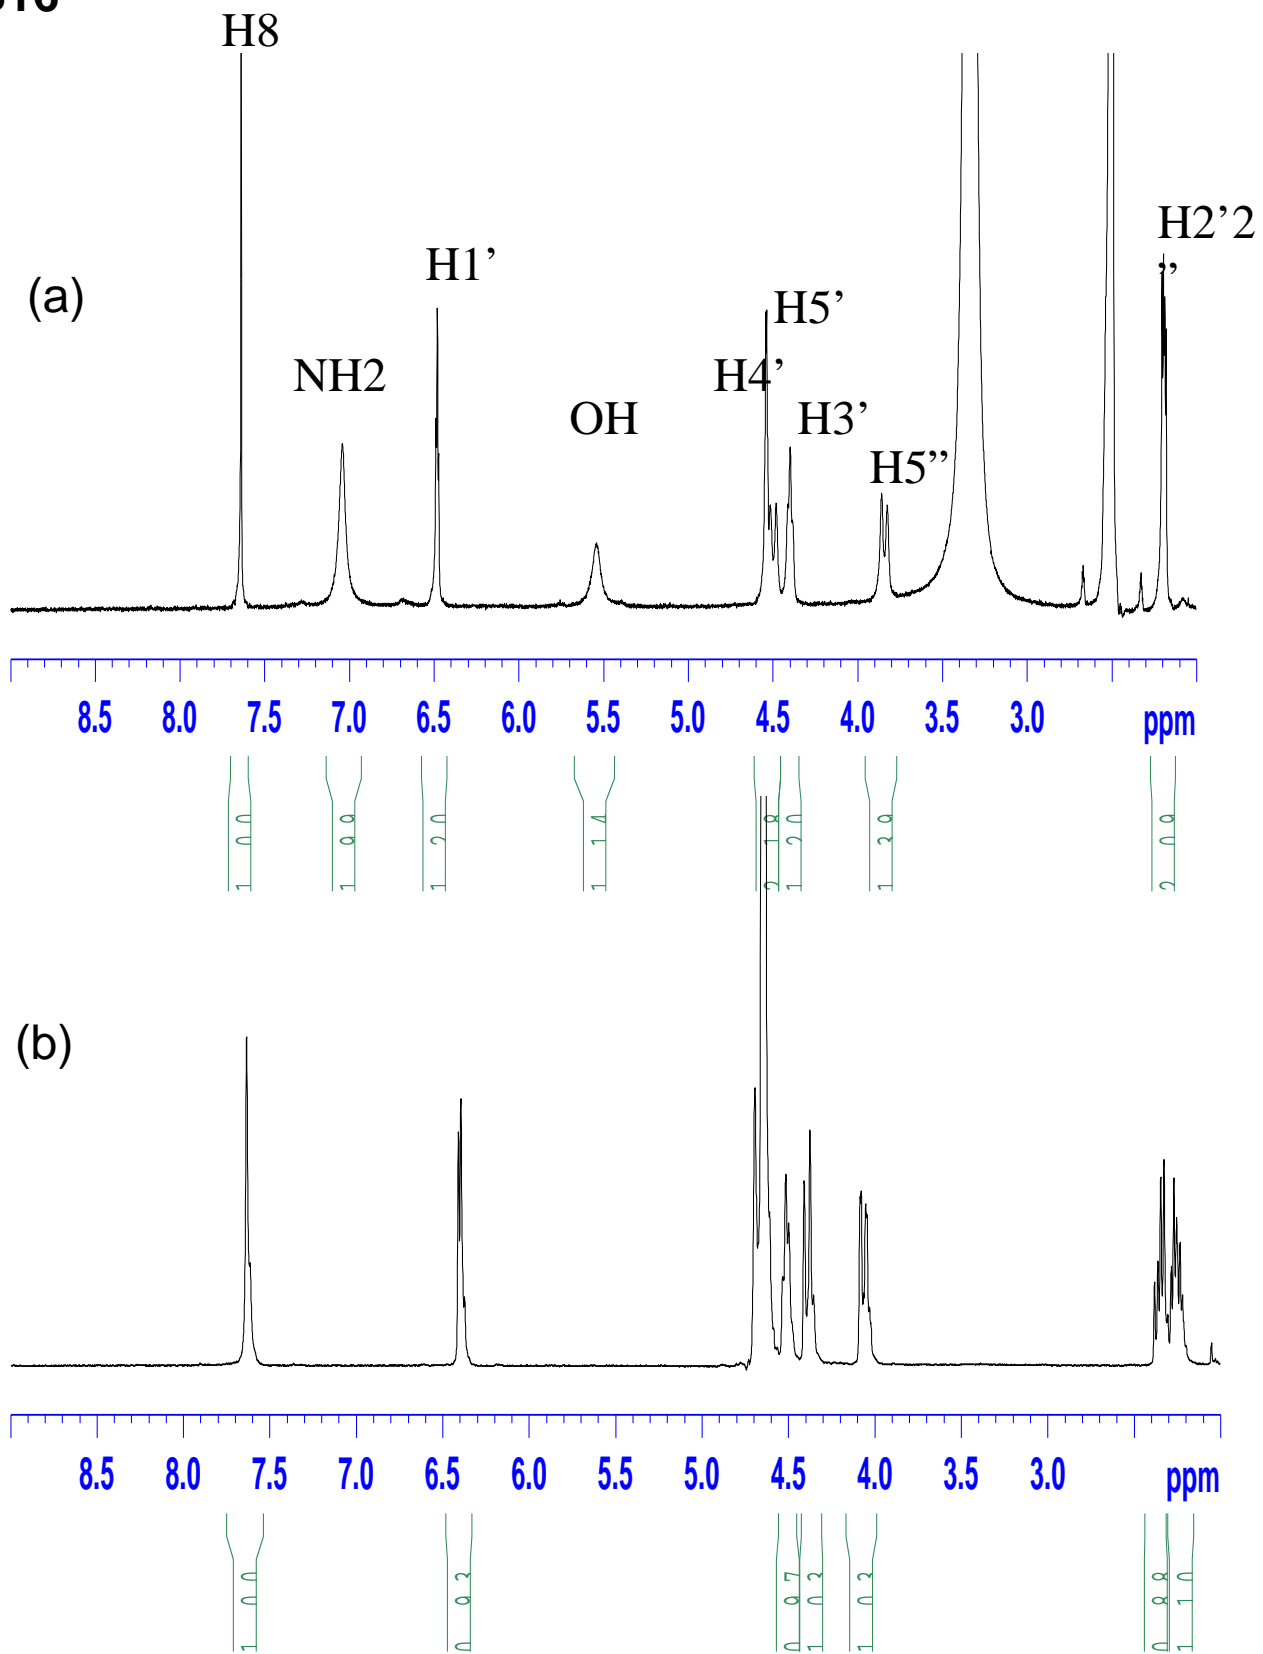

**Figure S13:**  $^1\text{H}$  NMR spectrum of cyclo-dG (**16**) recorded in (a) DMSO- $d_6$  and with  $\text{D}_2\text{O}$  added.



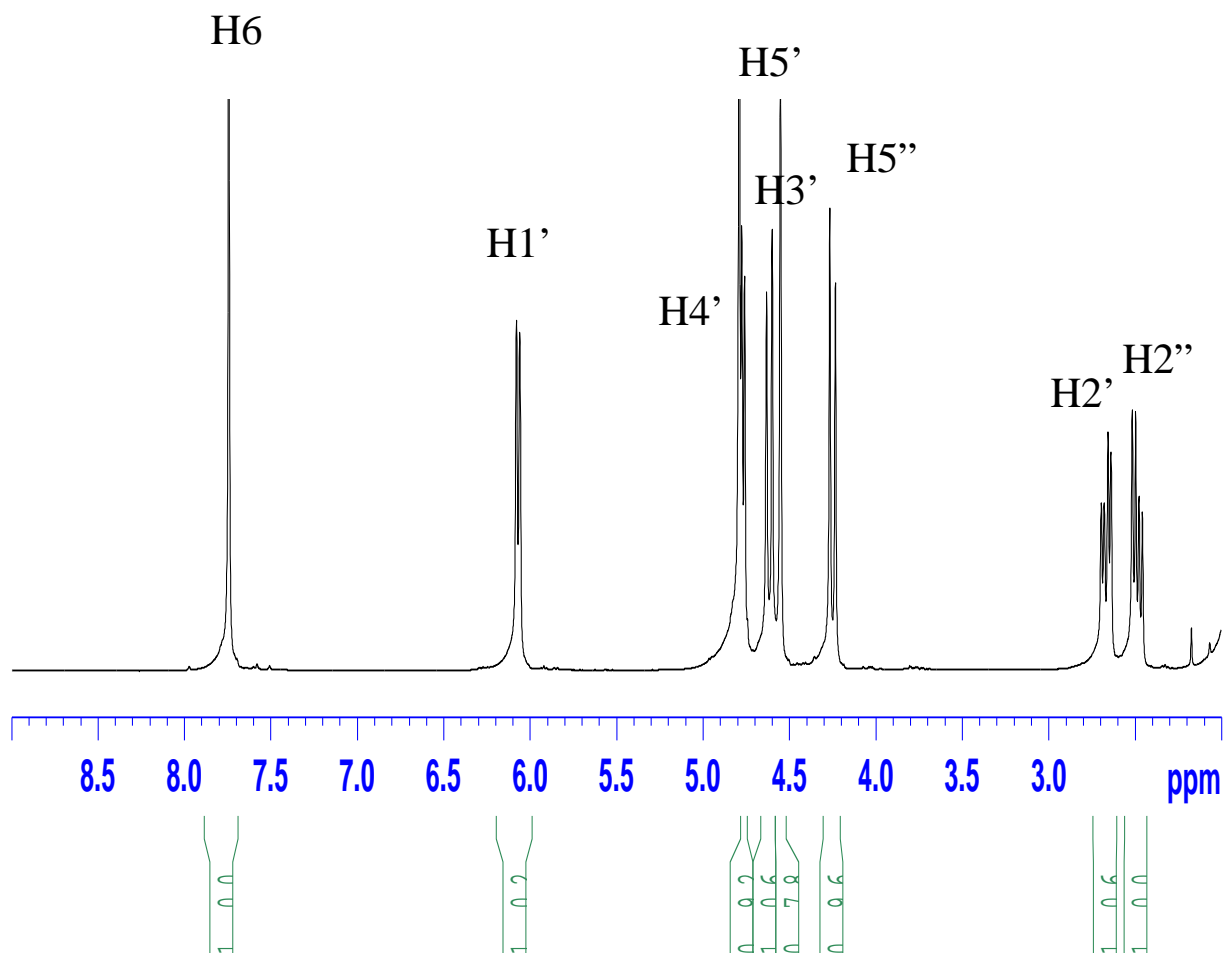

**Figure S14:**  $^1\text{H}$  NMR spectrum of cyclo-dT (17) recorded in  $\text{D}_2\text{O}$ .

$\alpha,\beta$ -methylene-GDP (11)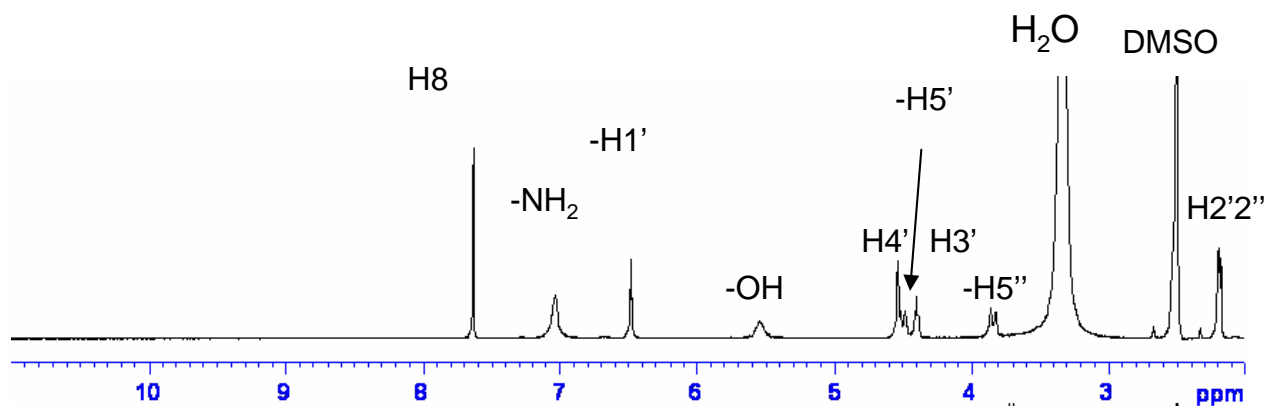

## Cyclo-dG (16)

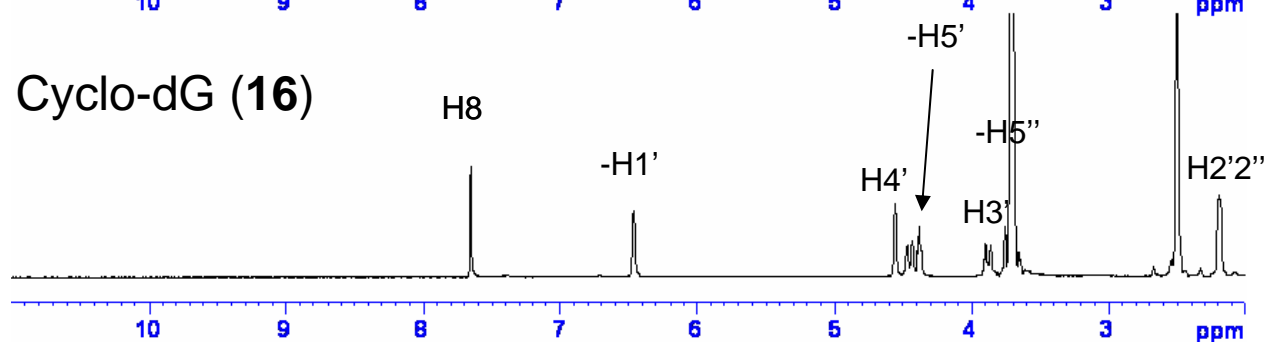

**Figure S15.** Comparison of <sup>1</sup>H NMR spectra of  $\alpha,\beta$ -methylene-dGDP (11) and cyclo-dG (16) recorded in DMSO-d<sub>6</sub>.

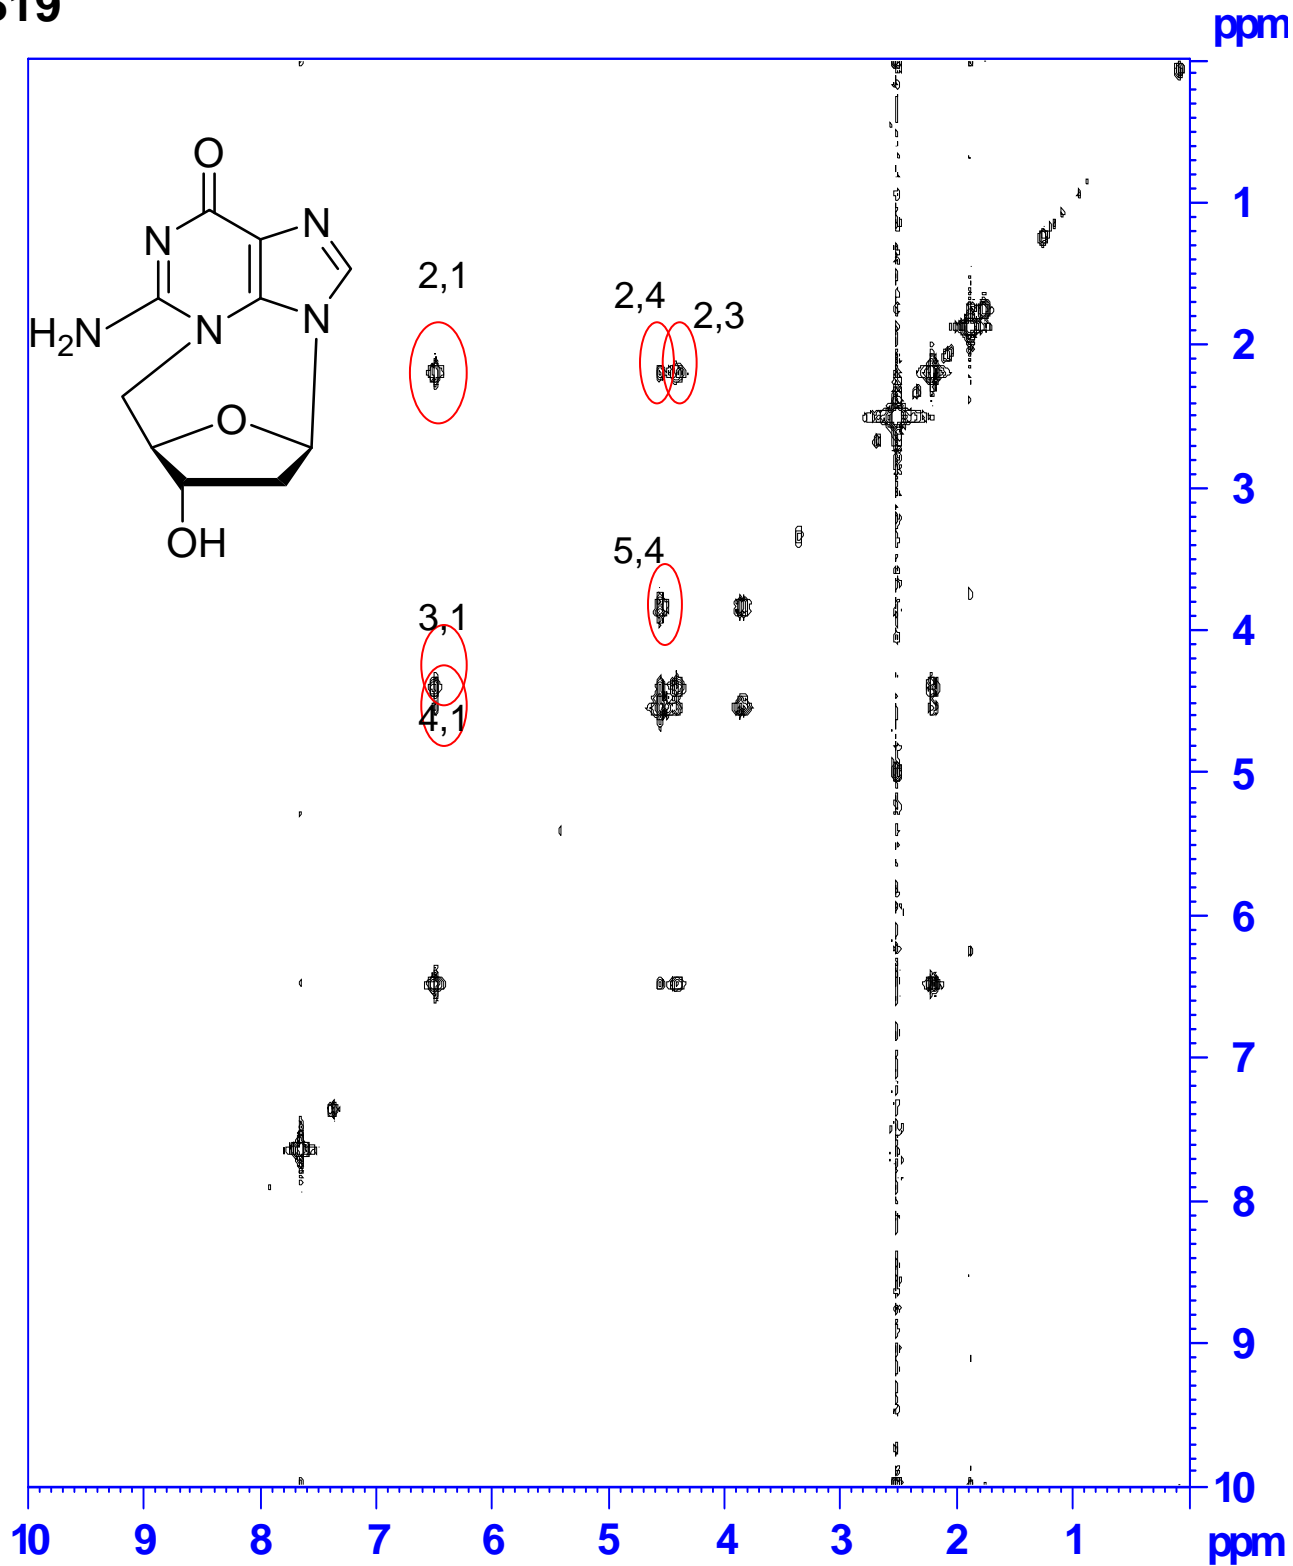

Figure S16. TOCSY  $^1\text{H}$  NMR spectrum of cyclo-dG (**16**) recorded in  $\text{DMSO-d}_6$ .

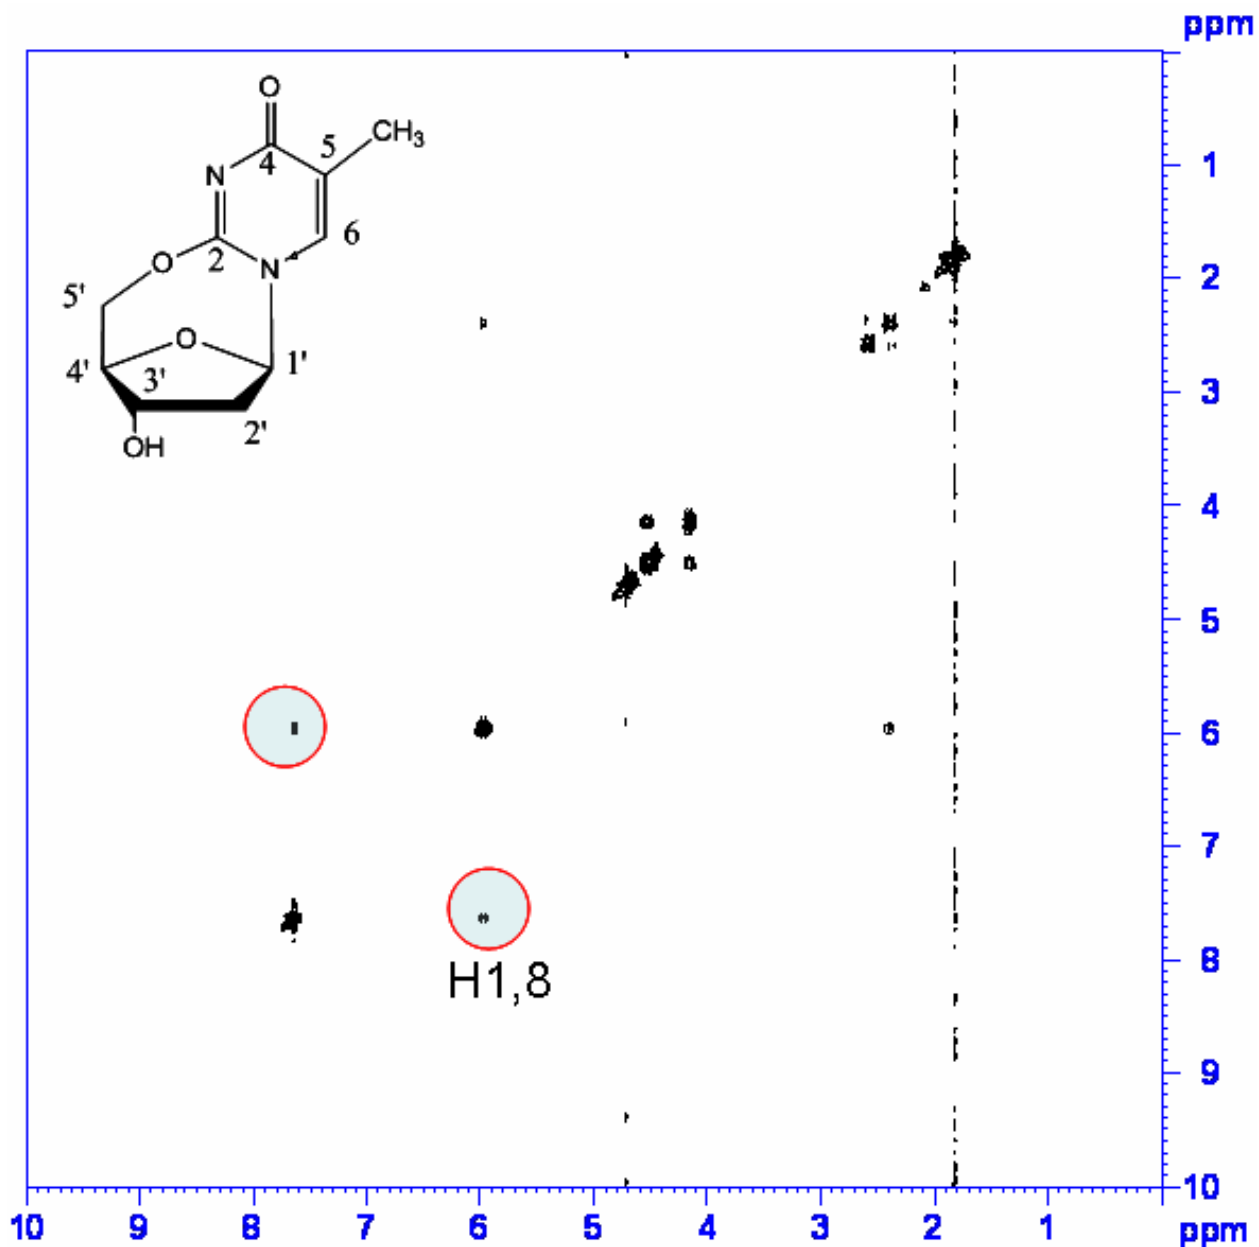

**Figure S17.** NOSEY  $^1\text{H}$  NMR spectrum of cyclo-dT(17) recorded in  $\text{DMSO-d}_6$ . The cross-peaks circled in red indicate the close proximity of the H6 and H1' protons (i.e., *syn*-glycosidyl conformation).

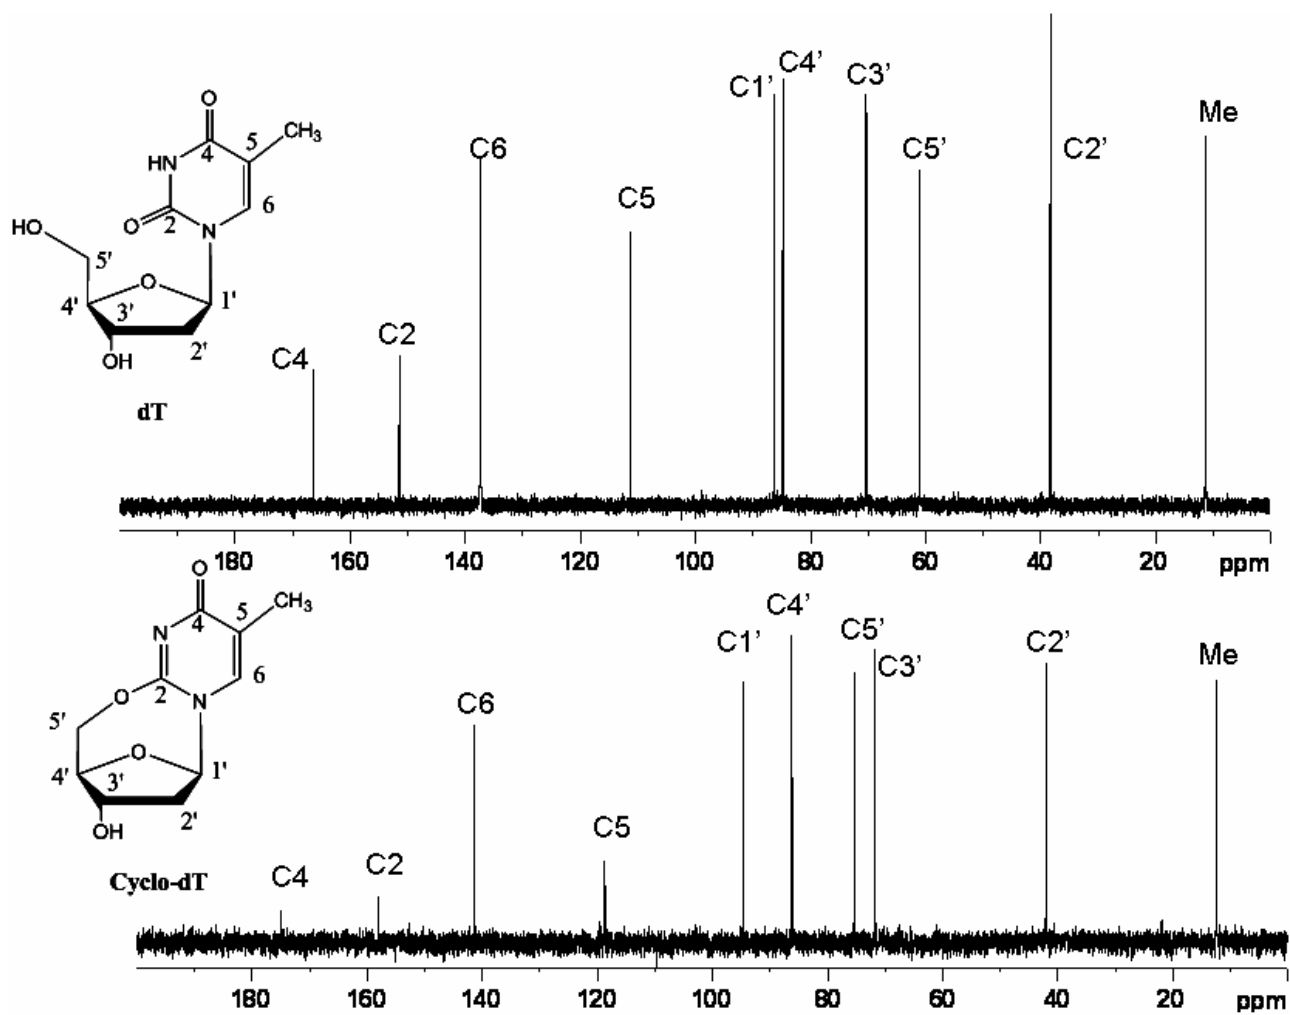

Figure S18. Comparison of  $^{13}\text{C}$  NMR of dT and cyclo-dT (17) recorded in  $\text{DMSO-d}_6$ .

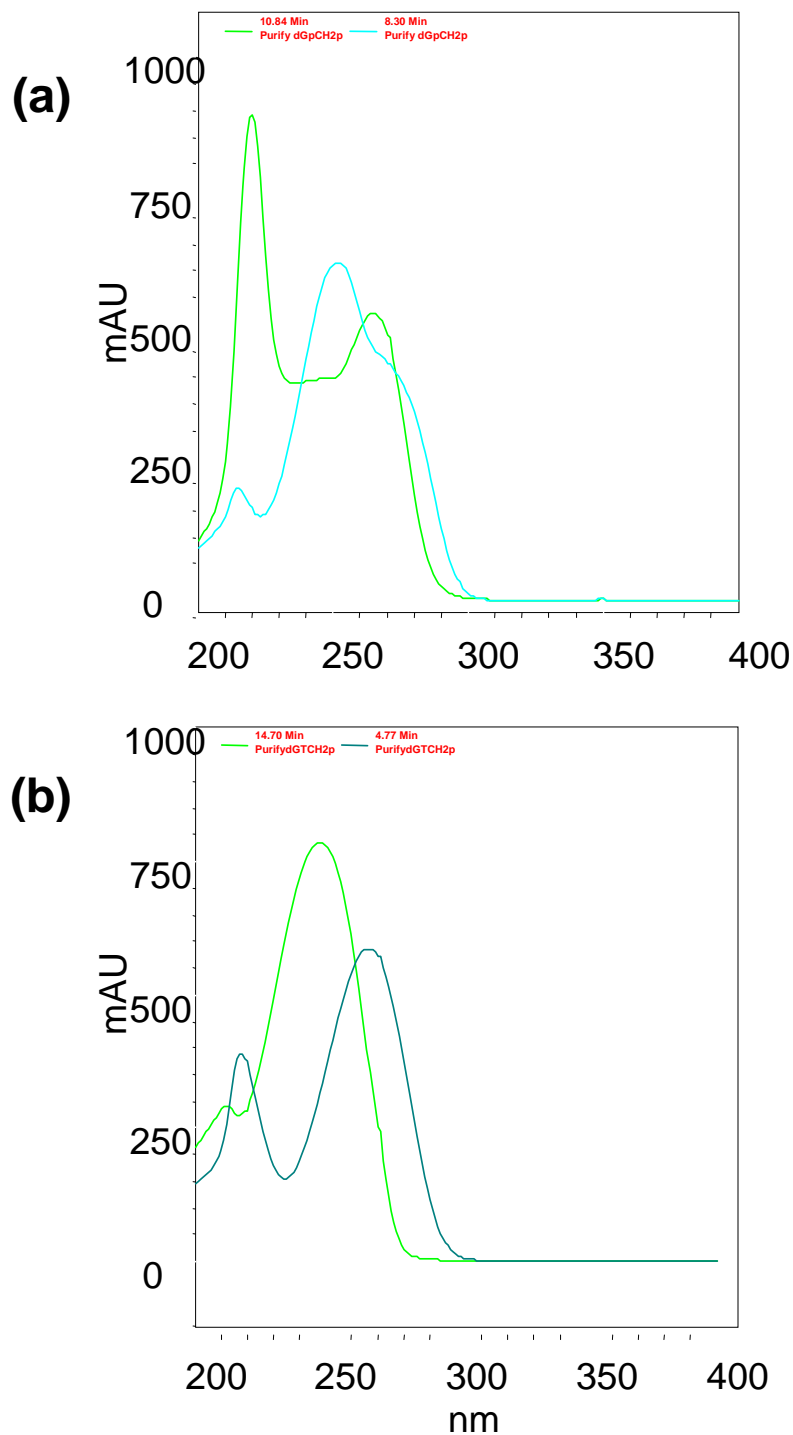

**Figure S19.** Comparison of UV of (a)  $\alpha,\beta$ -methylene-dGDP (11)(green) and cyclo-dG (16) (blue); (b)  $\alpha,\beta$ -methylene-dTDP (10)(green) and cyclo-dT (17)(blue).

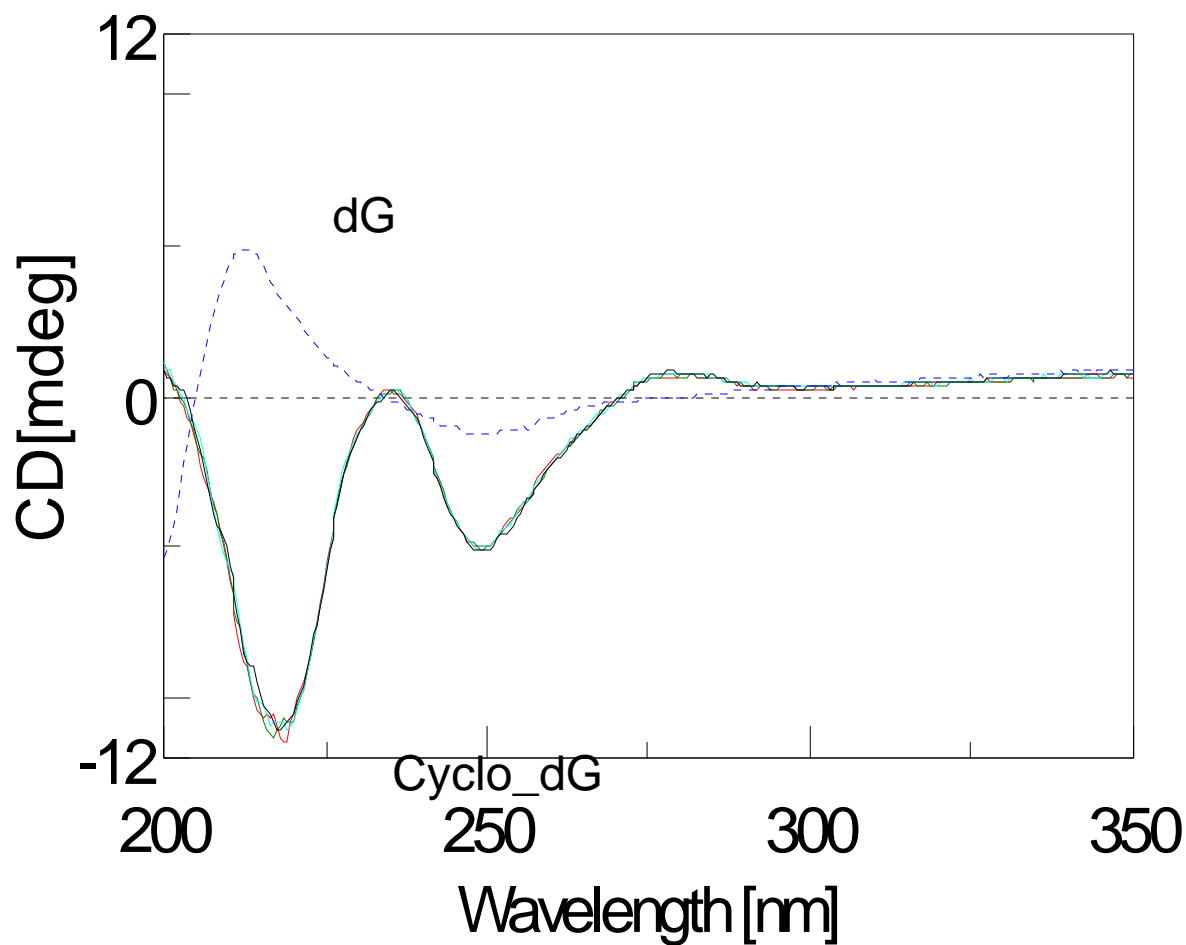

**Figure S20.** The CD spectra of cyclo-dG (**16**) as a function of time (0 - 6 h) every hour at 90 °C in comparison with dG (dotted blue lines)..

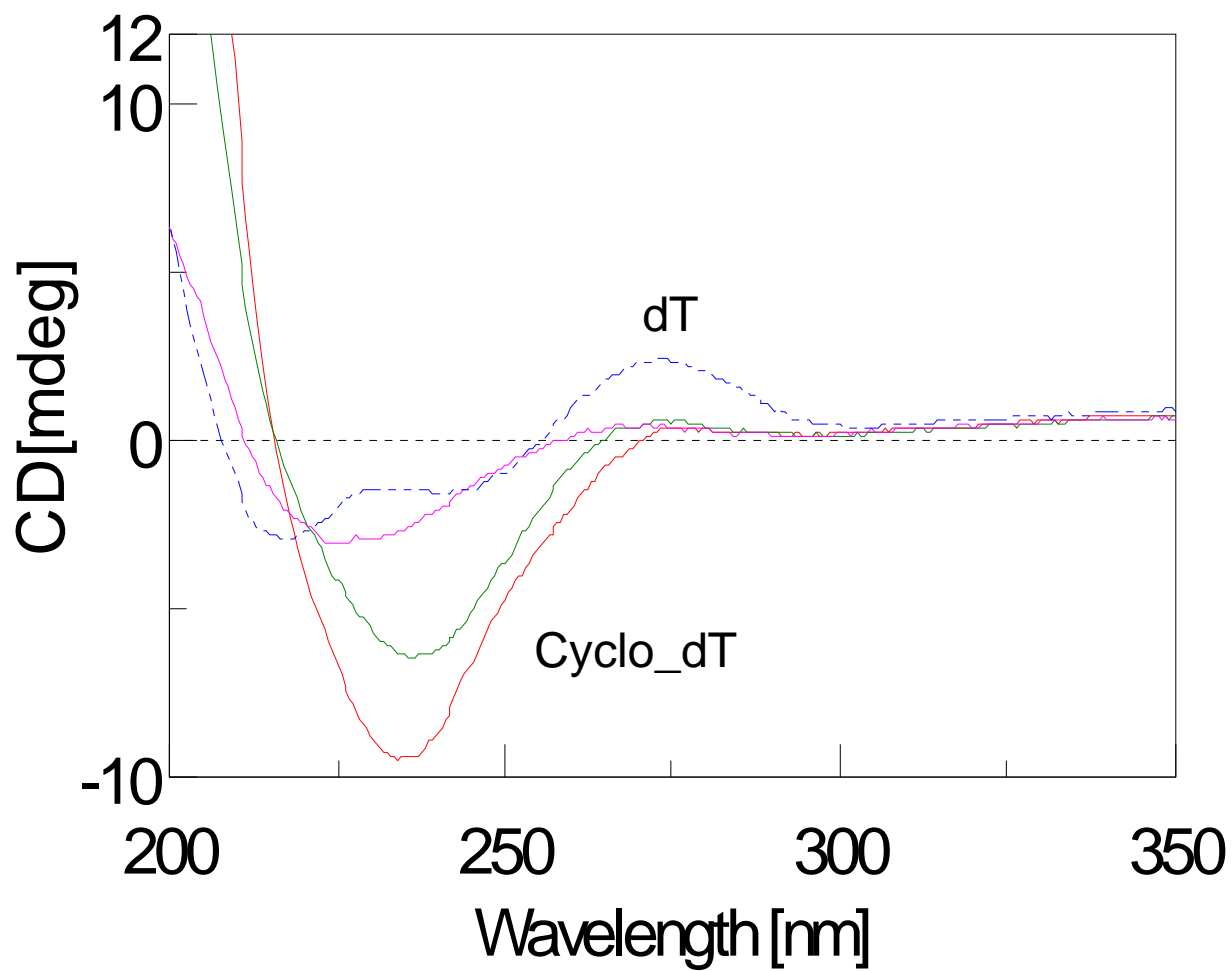

**Figure S21.** The CD spectra of cyclo-dT (**17**) as a function of time (0- 6 h) at 90 °C in comparison with dT (dotted blue lines).



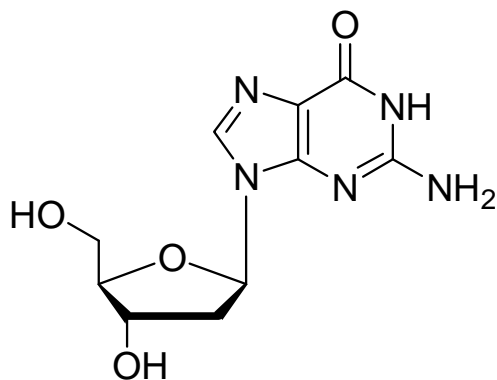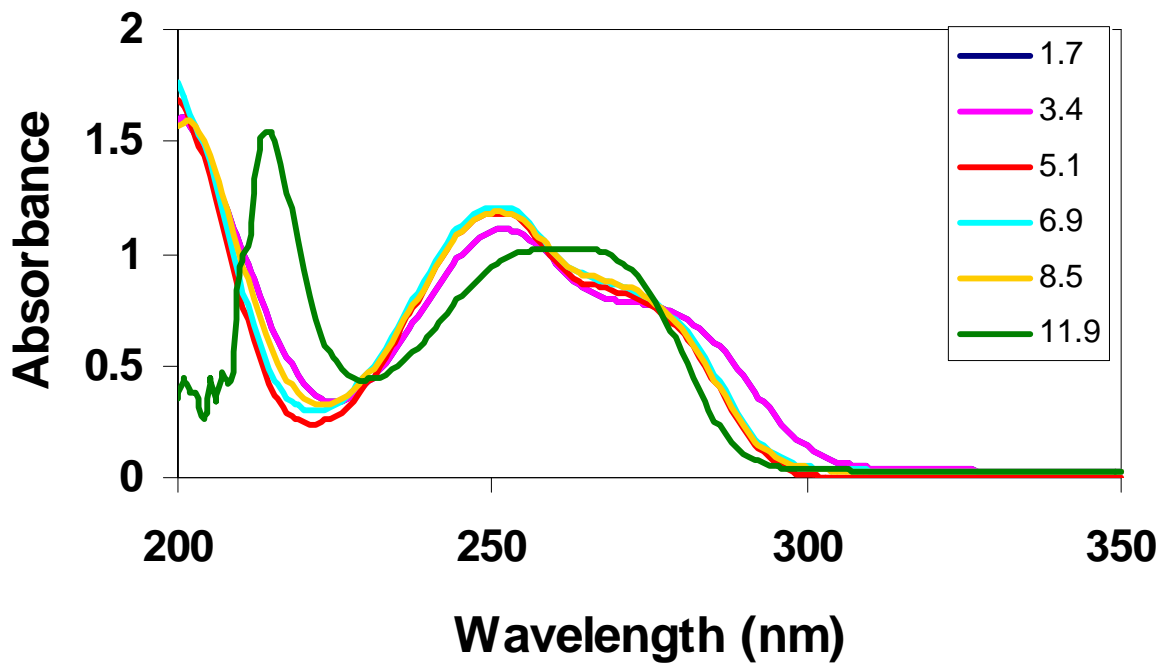

Figure S22. pH dependence UV spectra of dG.

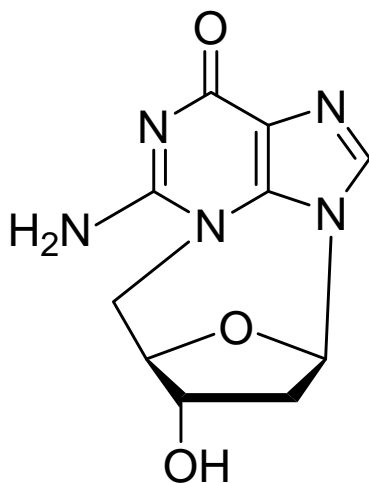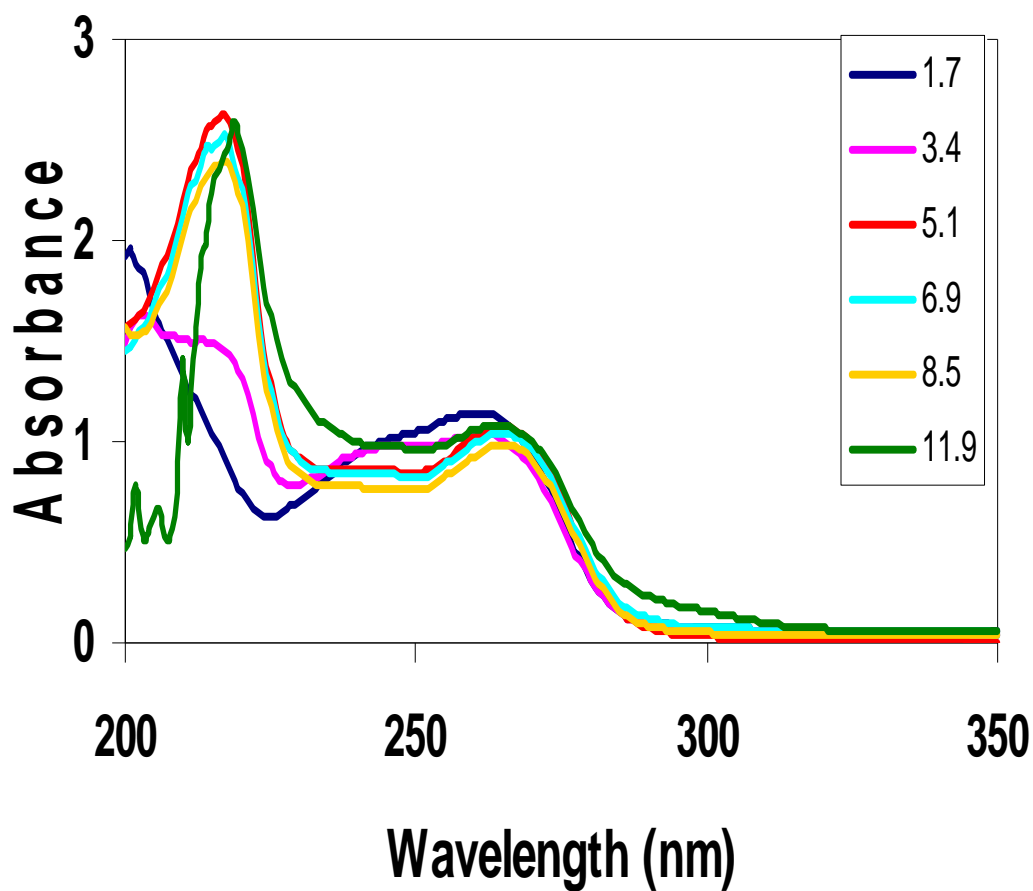

Figure S23. pH dependence UV spectra of cyclo-dG (16).

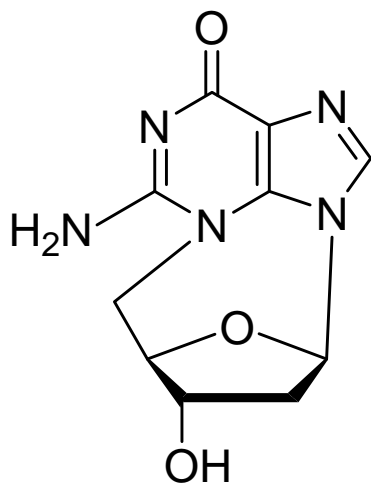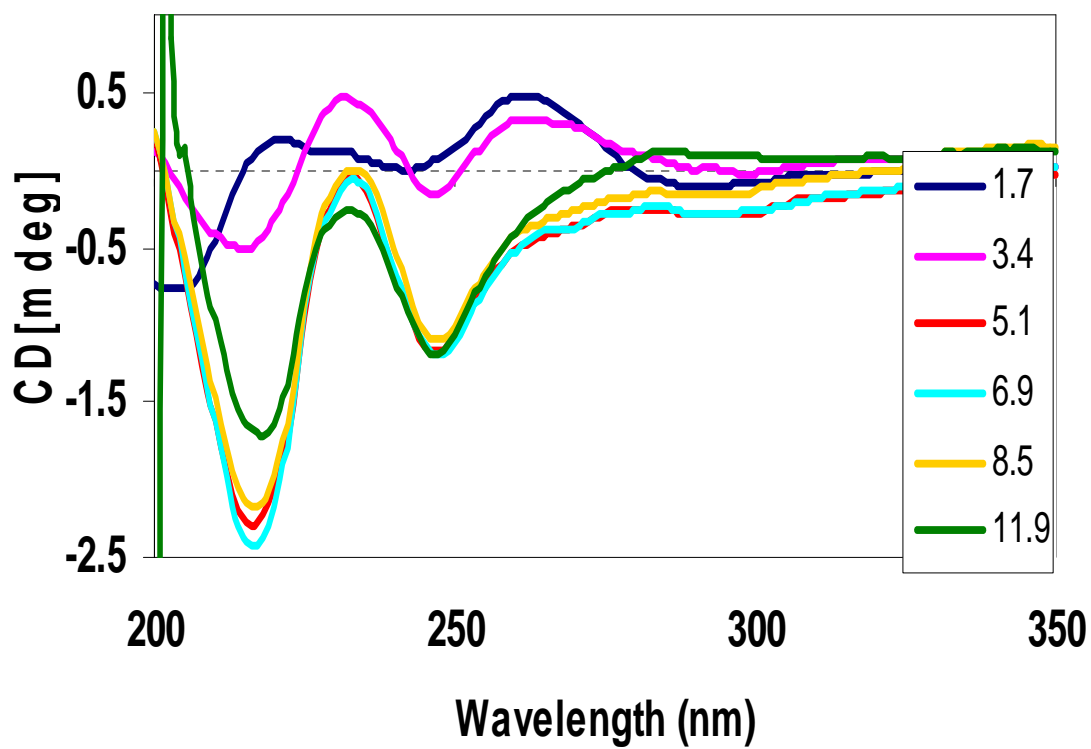

Figure S24. pH dependence CD spectra of cyclo-dG (16).

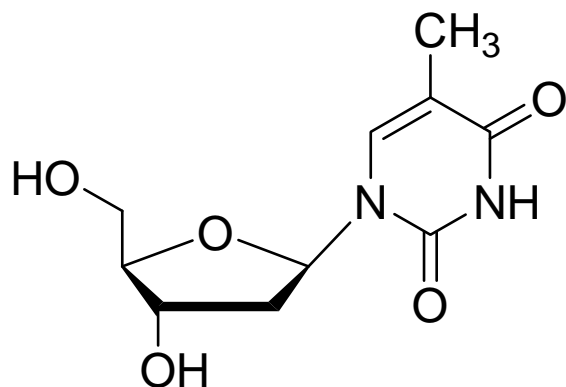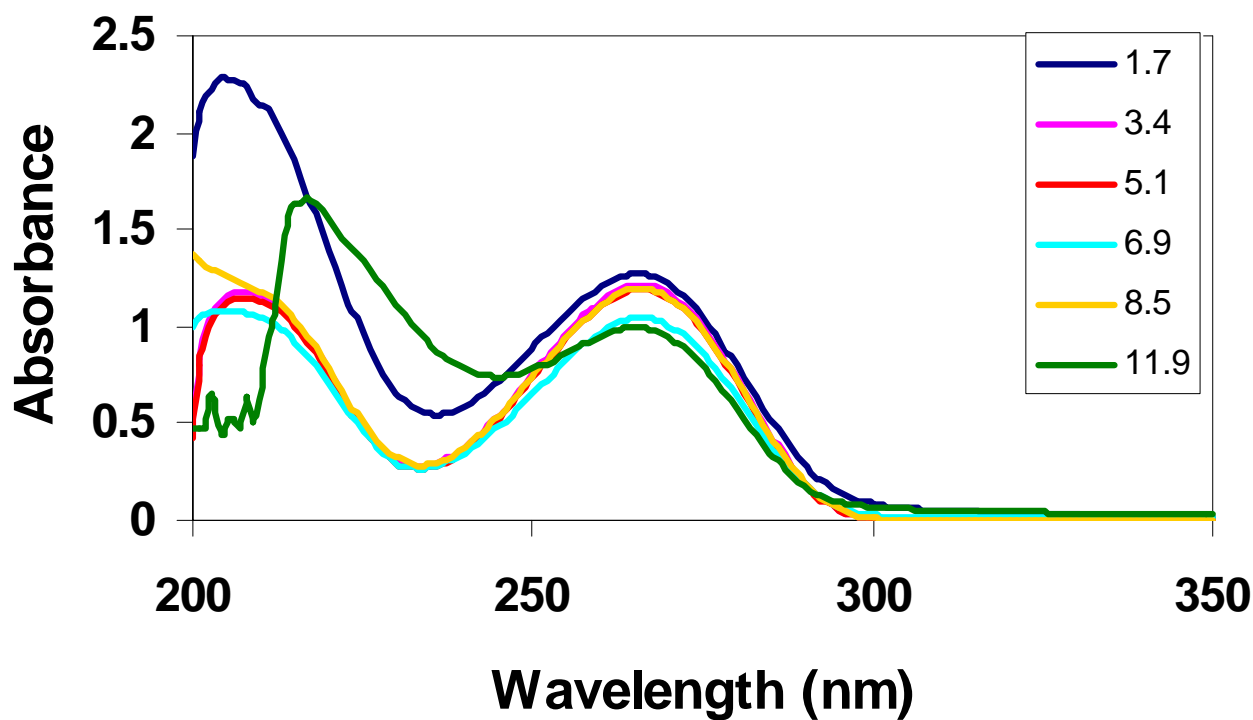

Figure S25. pH dependence UV spectra of dT.

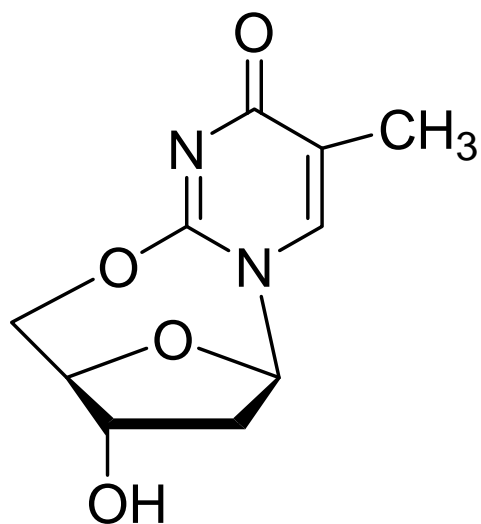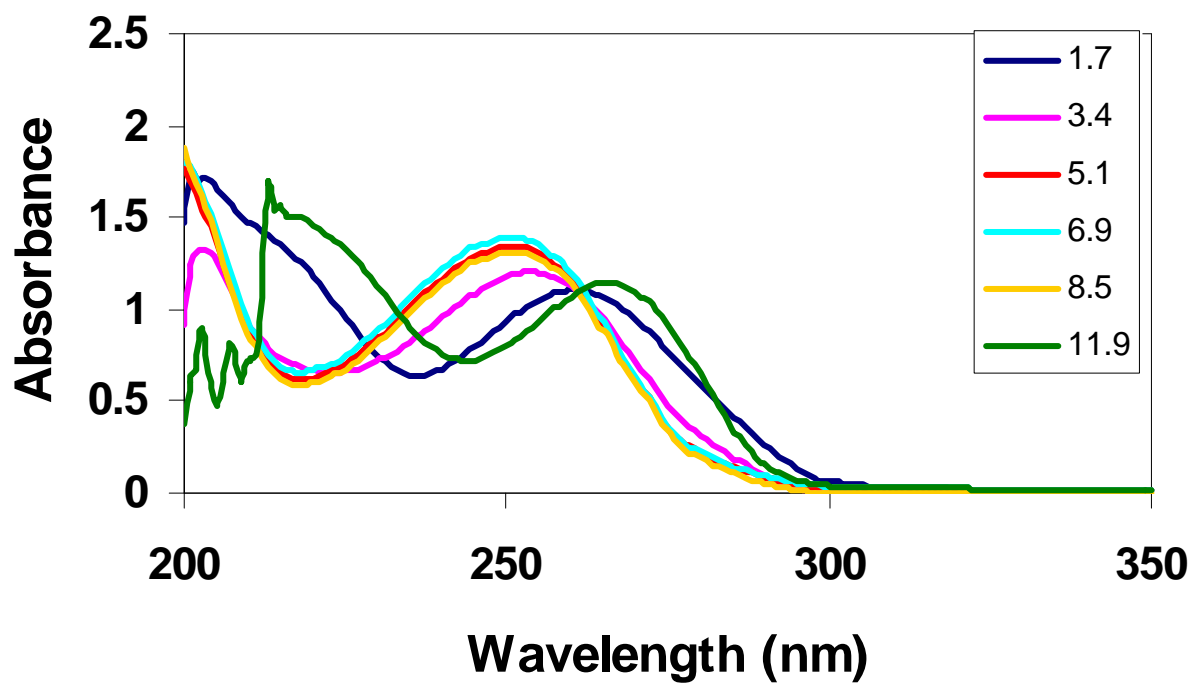

Figure S26. pH dependence UV spectra of cyclo-dT(17).

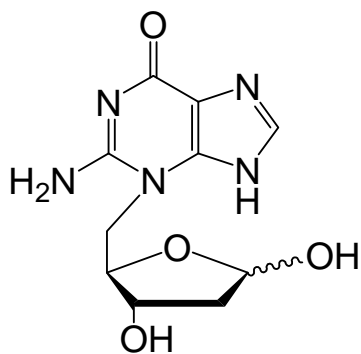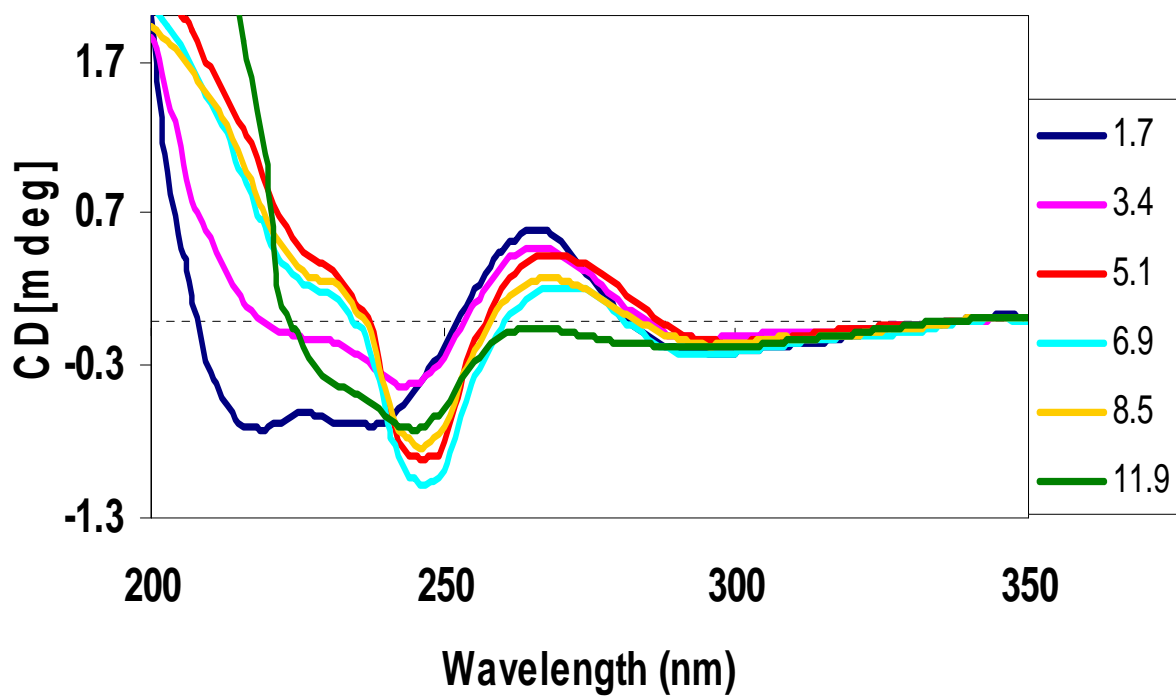

Figure S27. pH dependence CD spectra of 18.

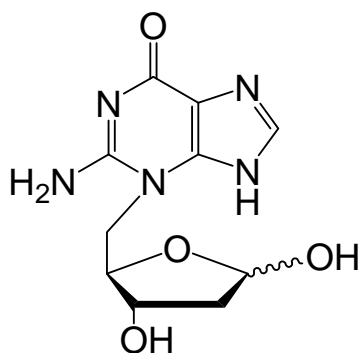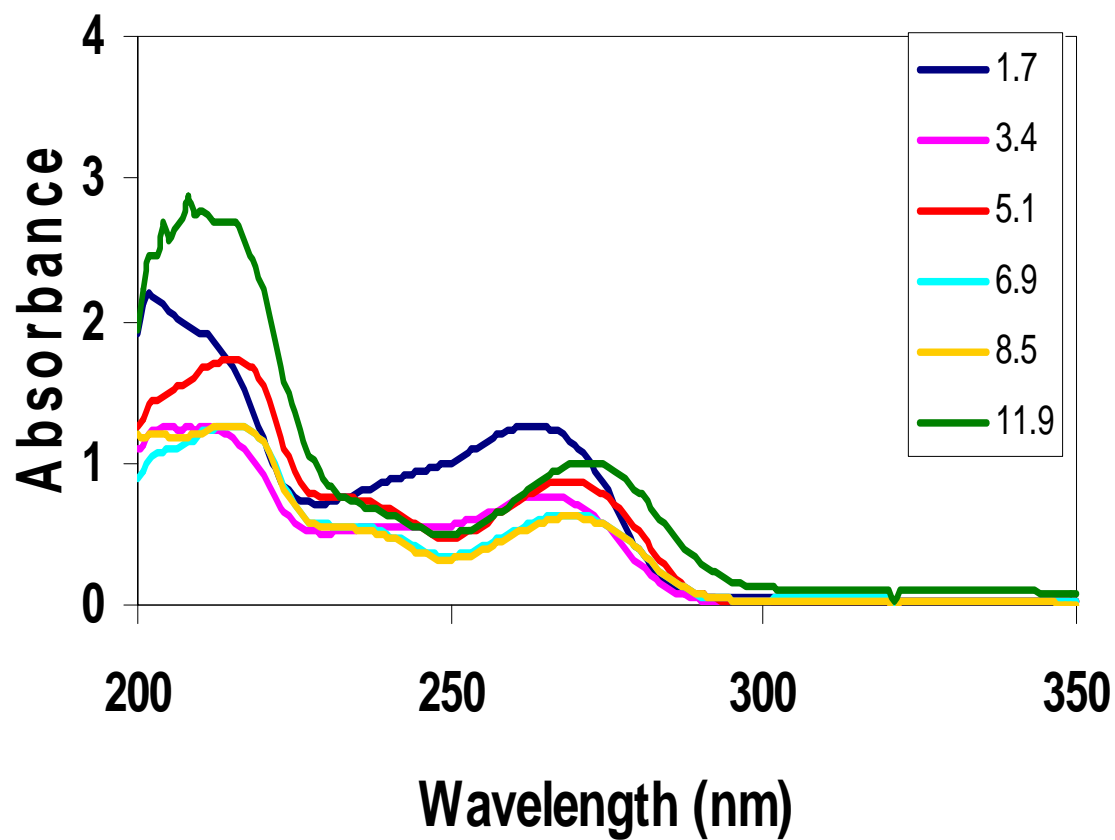

Figure S28. pH dependence UV spectra of 18.

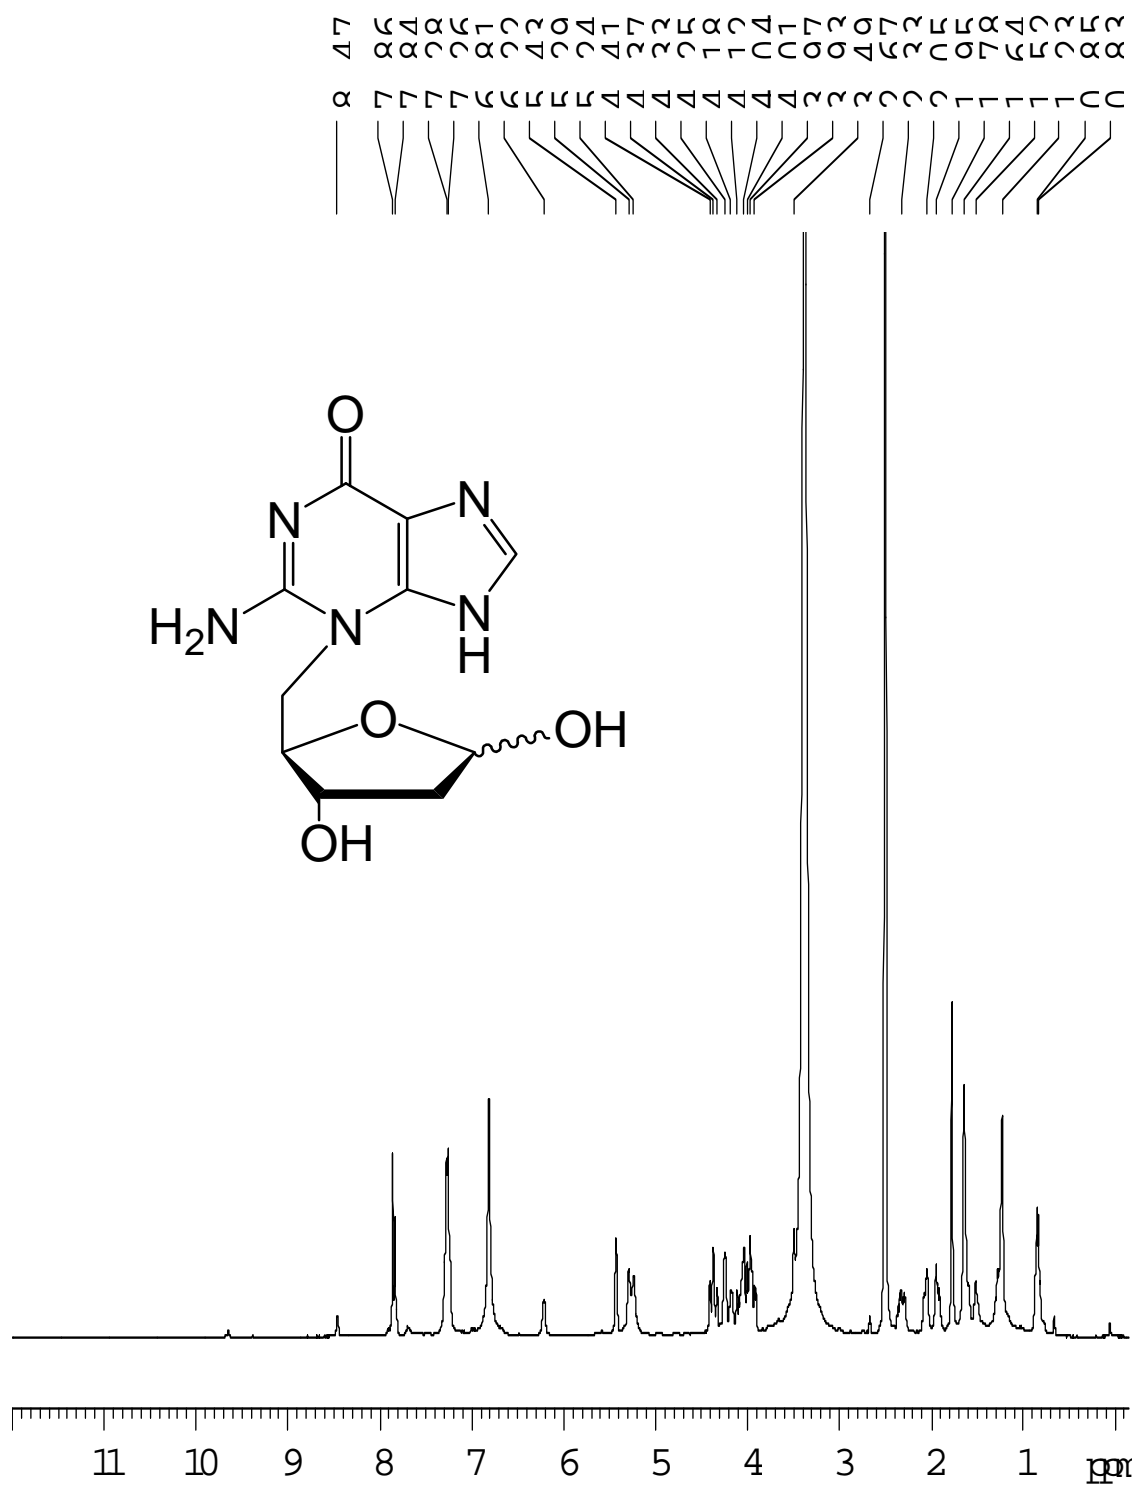

Figure S29.  $^1\text{H}$  NMR spectrum of **18** in  $\text{DMSO-d}_6$ .



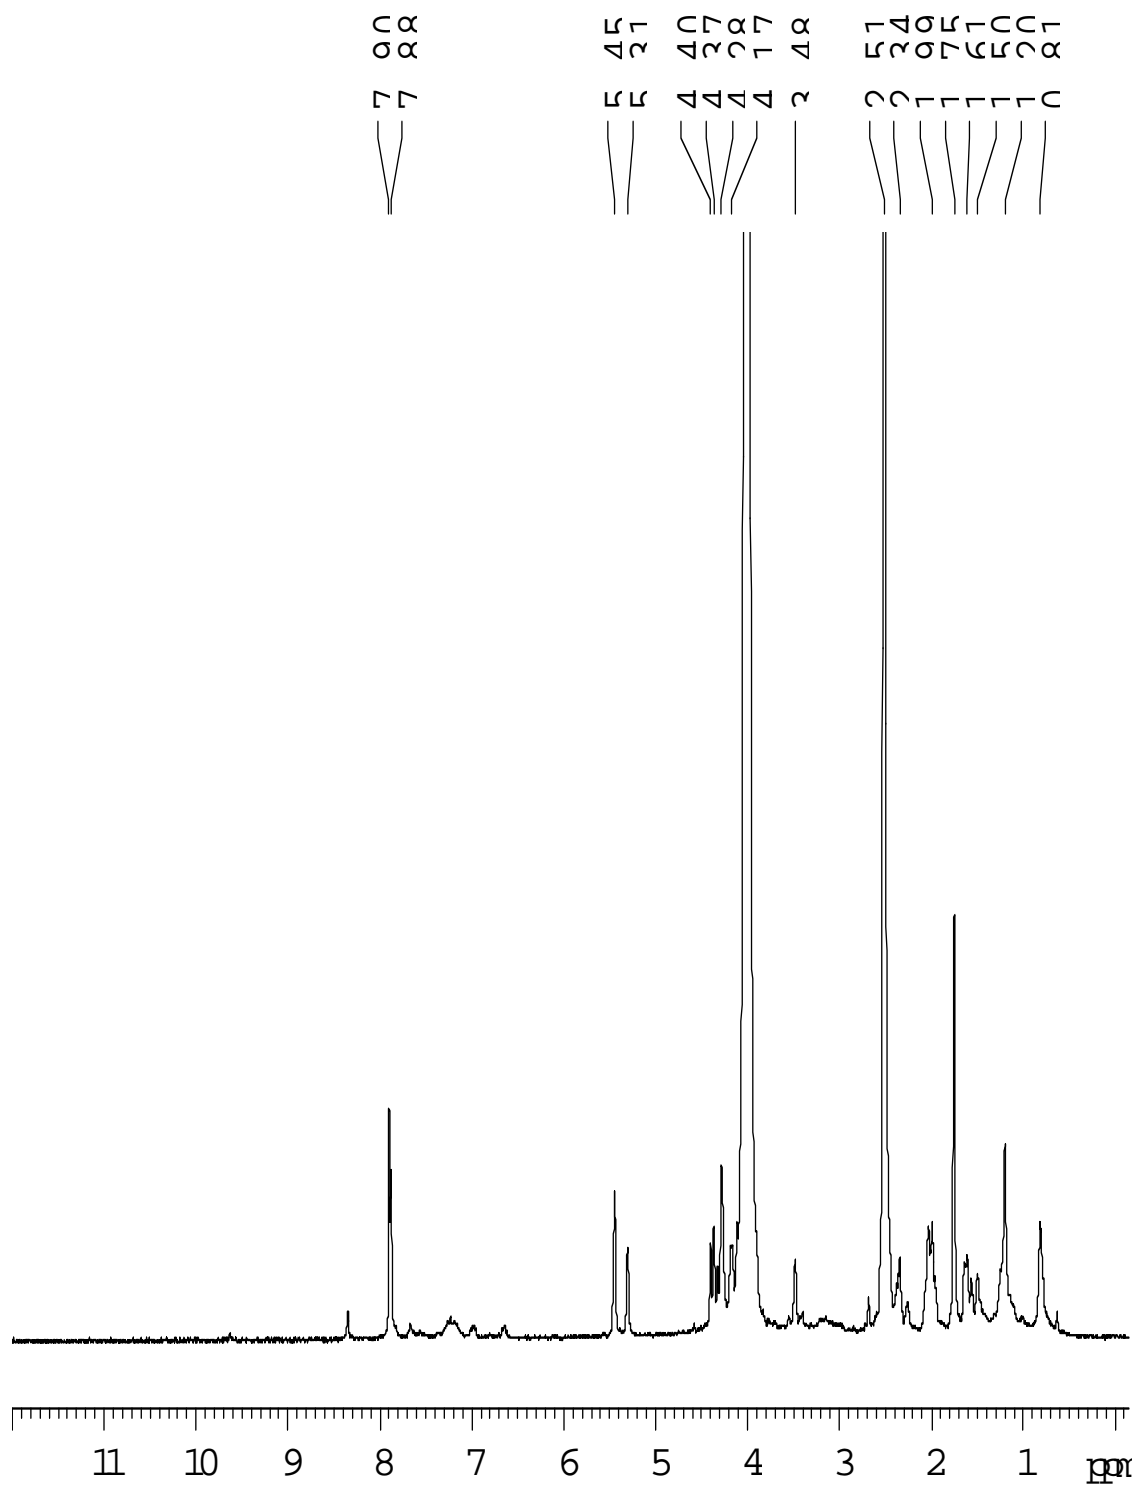

Figure S30.  $^1\text{H}$  NMR spectrum of **18** in DMSO- $d_6$  +  $\text{D}_2\text{O}$ .

S34

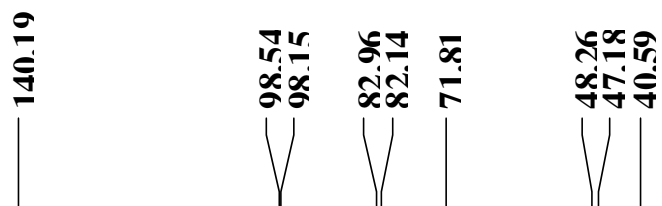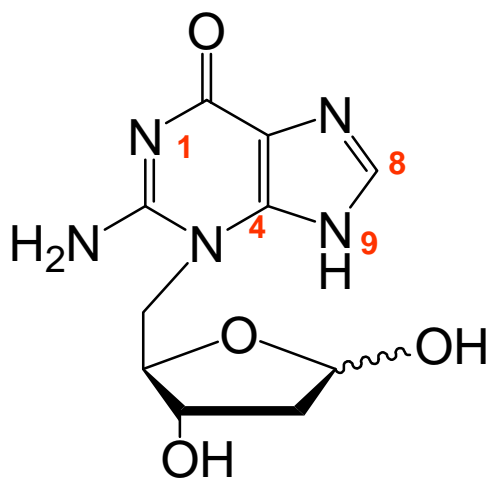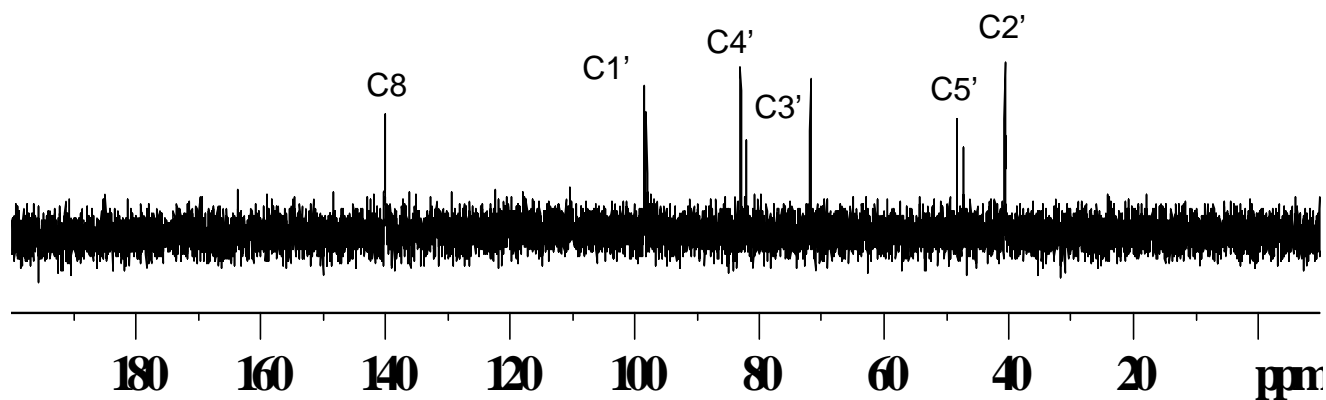

Figure S31.  $^{13}\text{C}$  NMR spectrum of **18** in  $\text{D}_2\text{O}$ .

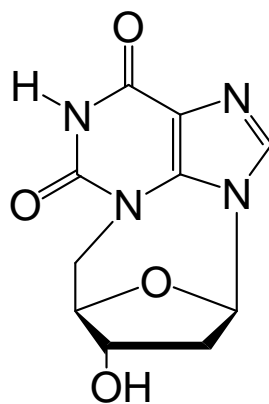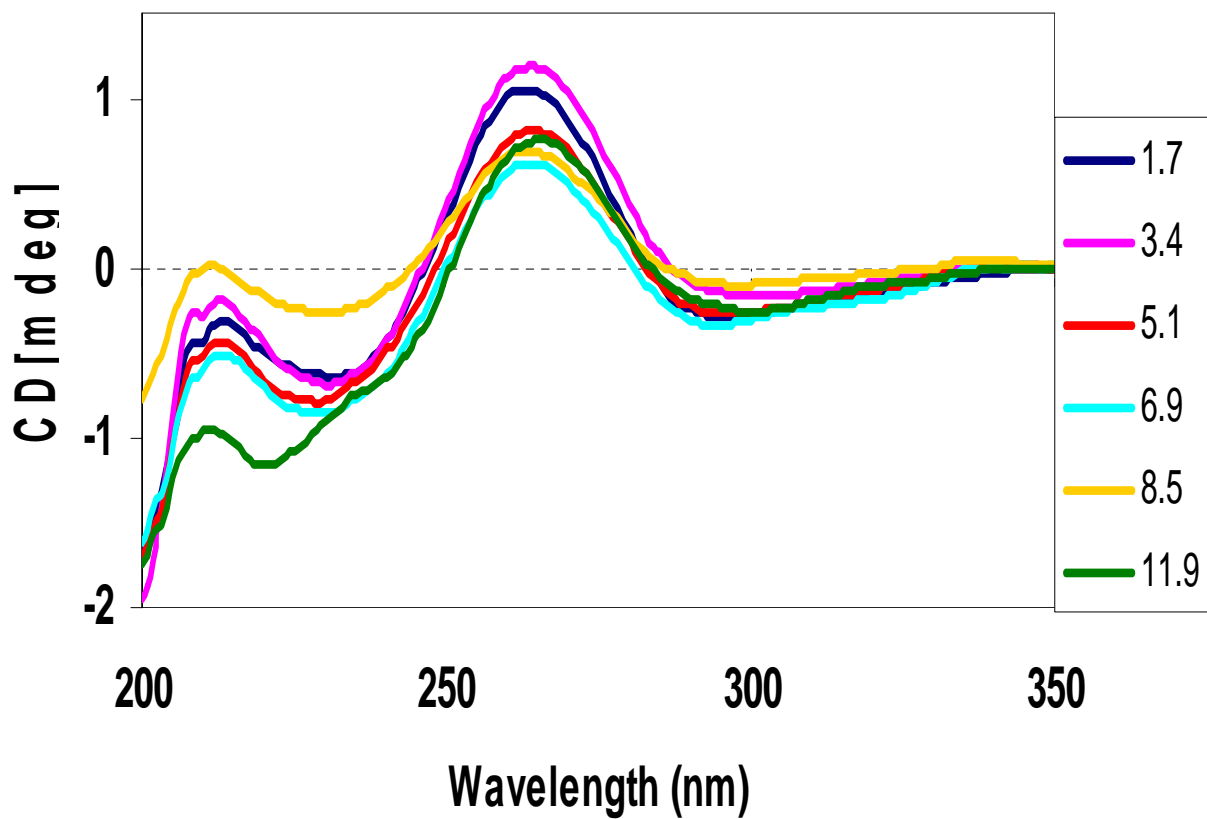

Figure S32. pH dependence CD spectra of cyclo-dX (**19**).

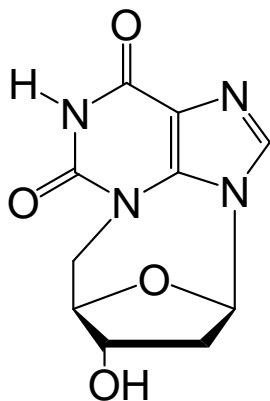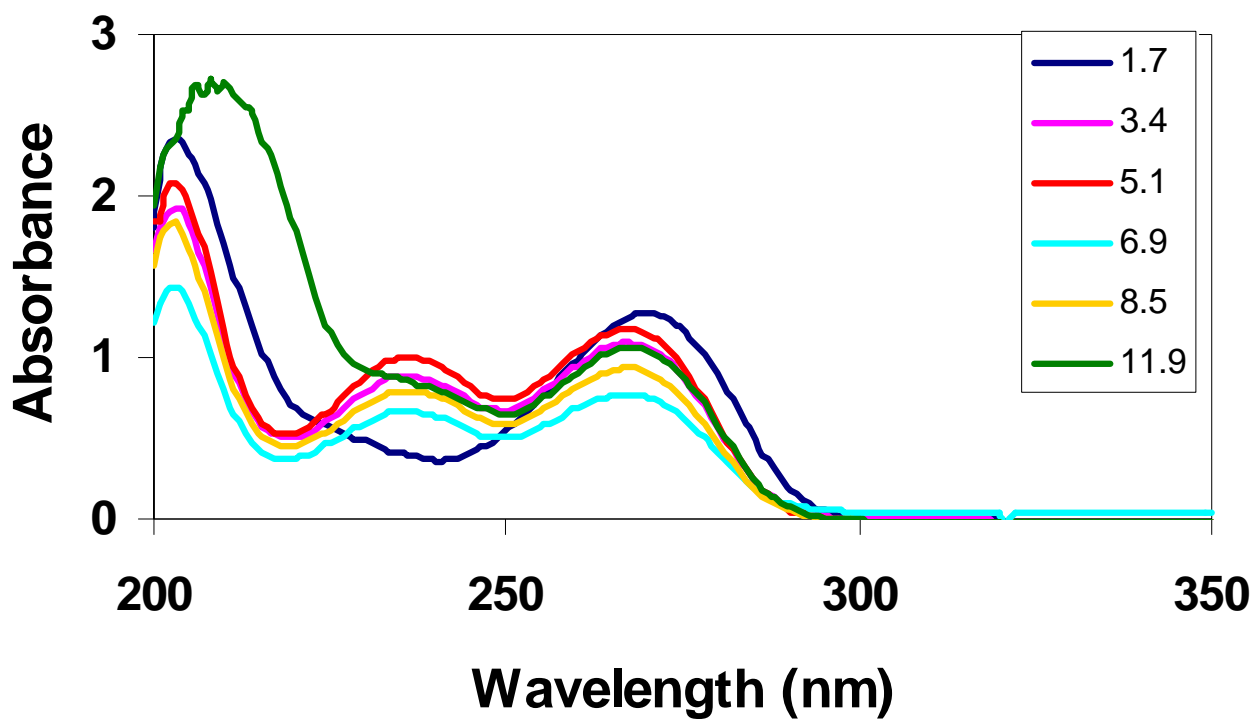

Figure S33. pH dependence UV spectra of cyclo-dX (19).

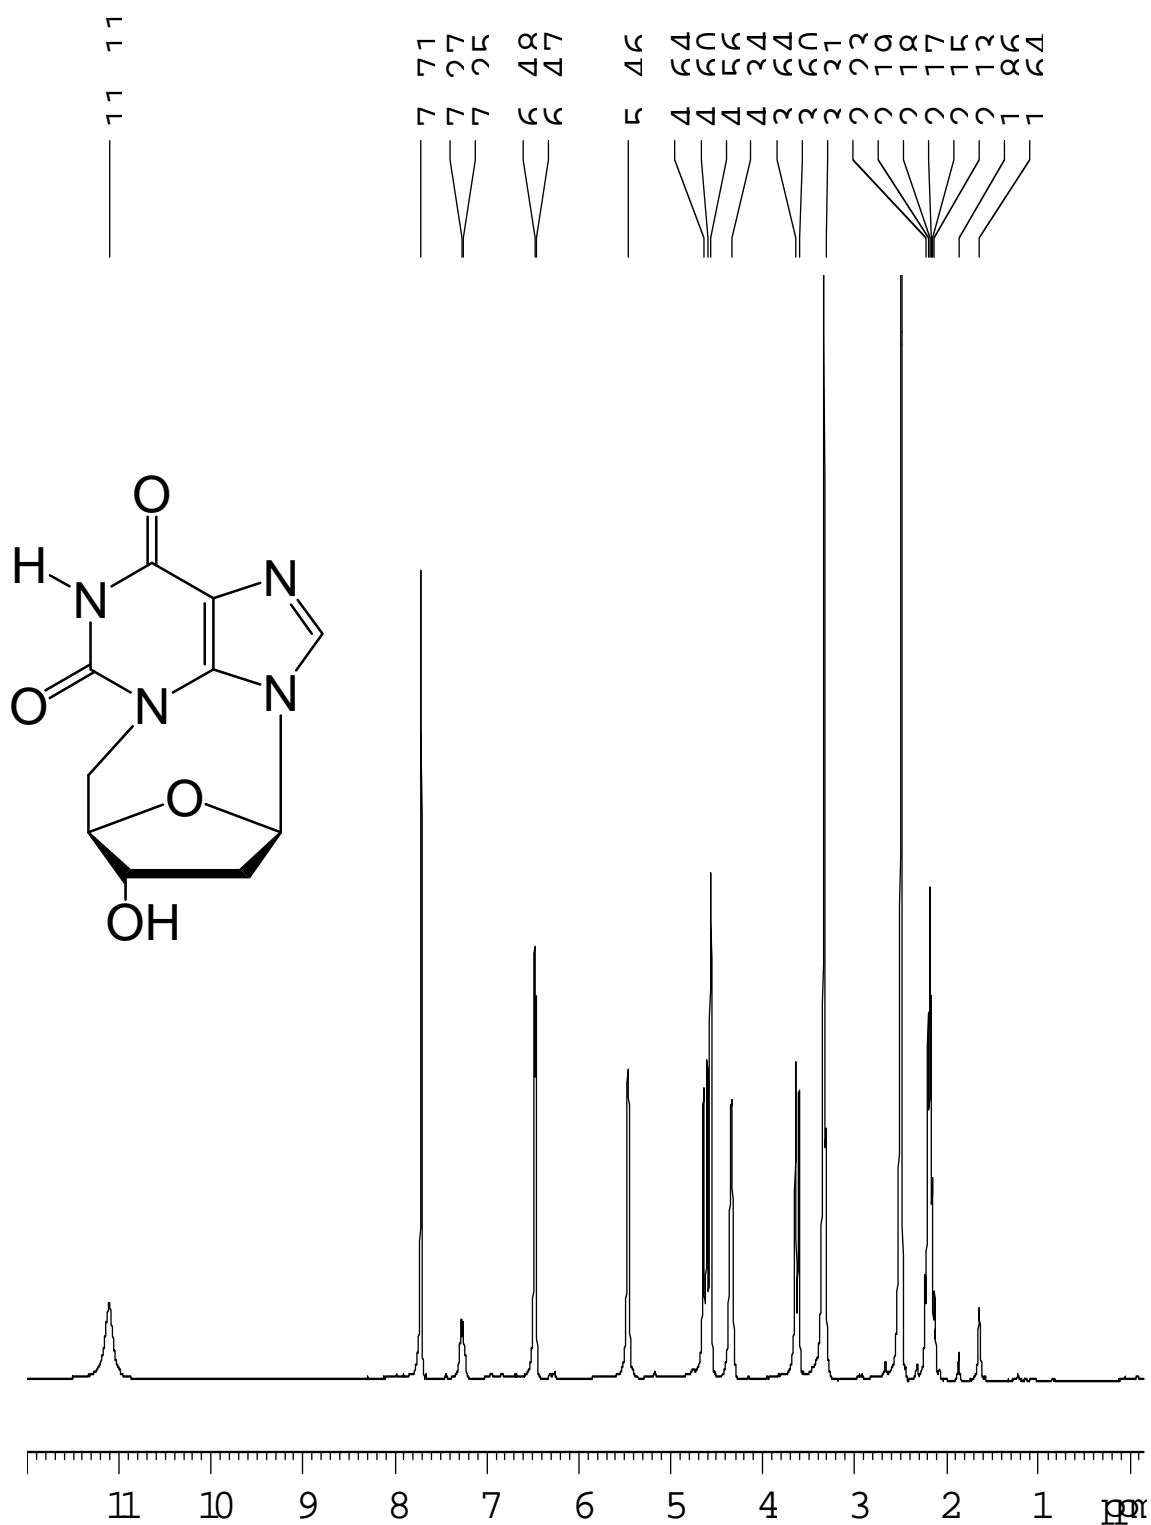

Figure S34. <sup>1</sup>H NMR spectrum of cyclo-dX (19) in DMSO-d<sub>6</sub>.

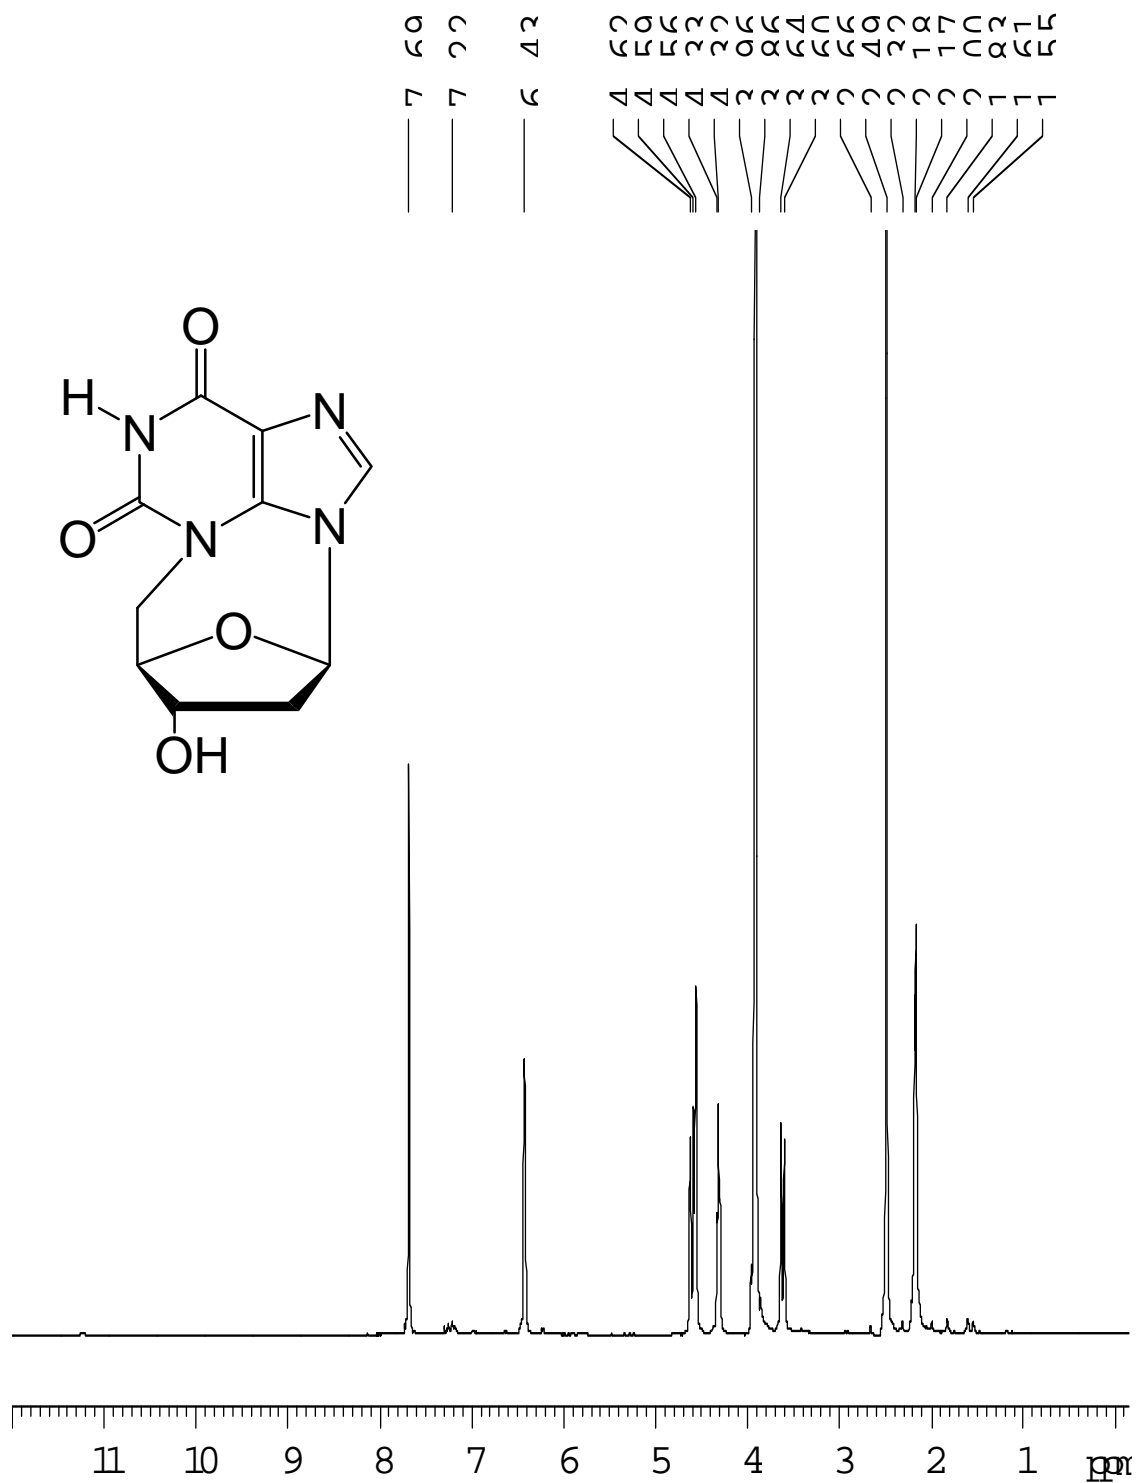

**Figure S35.** <sup>1</sup>H NMR spectrum of cyclo-dX (19) in DMSO-d<sub>6</sub> + D<sub>2</sub>O

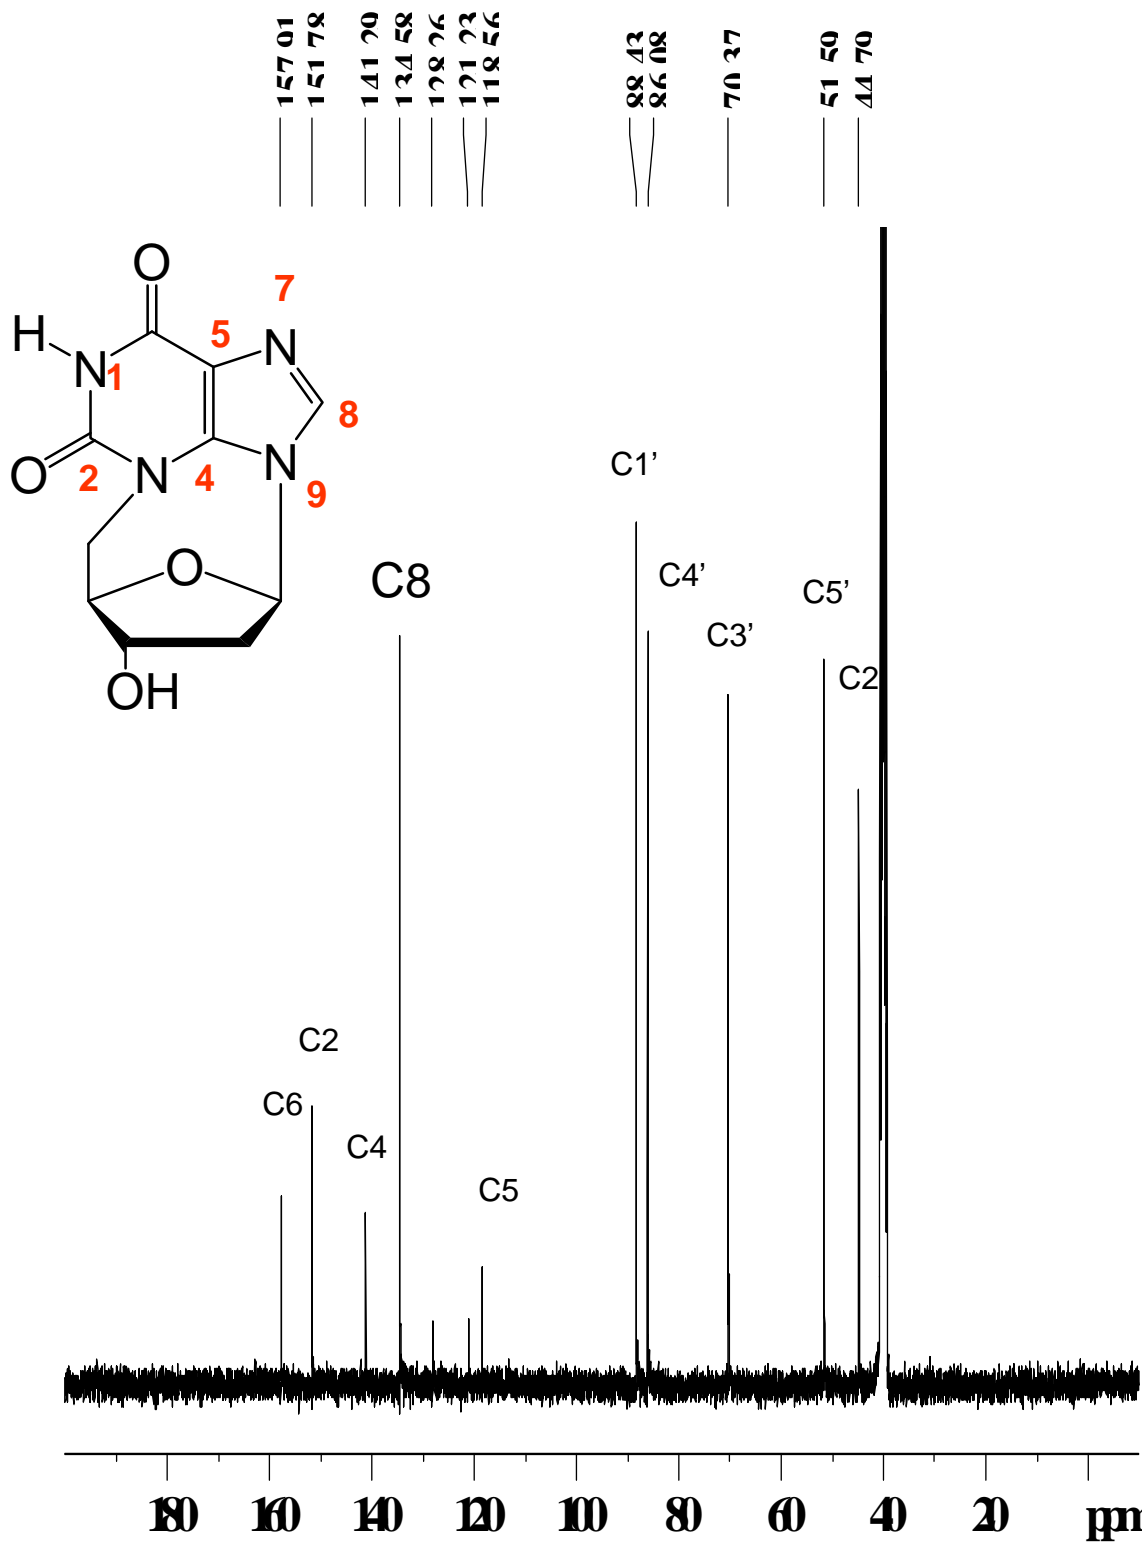

Figure S36.  $^{13}\text{C}$  NMR spectrum of cyclo-dX (19) in DMSO- $d_6$ .

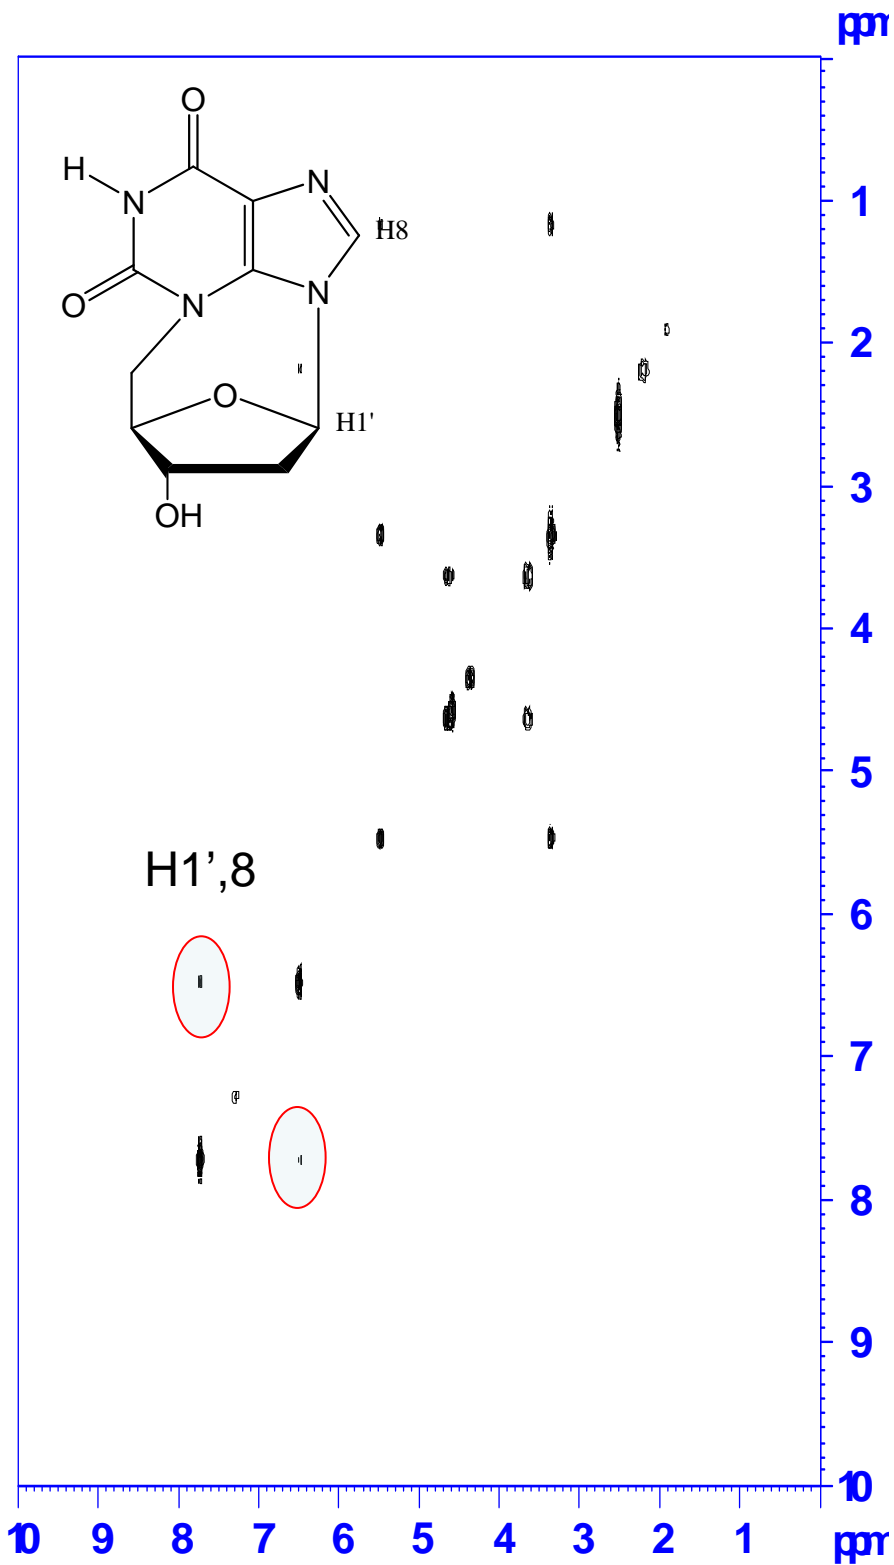

Figure S37. NOESY NMR spectrum of cyclo-dX (19) in DMSO-d<sub>6</sub>.



cdG\_base\_pdt2 #175-227 RT: 2.34-3.63 AV: 53 NL: 5.55E3  
T: + p Full ms2 251.00@25.00 [ 65.00-500.00]

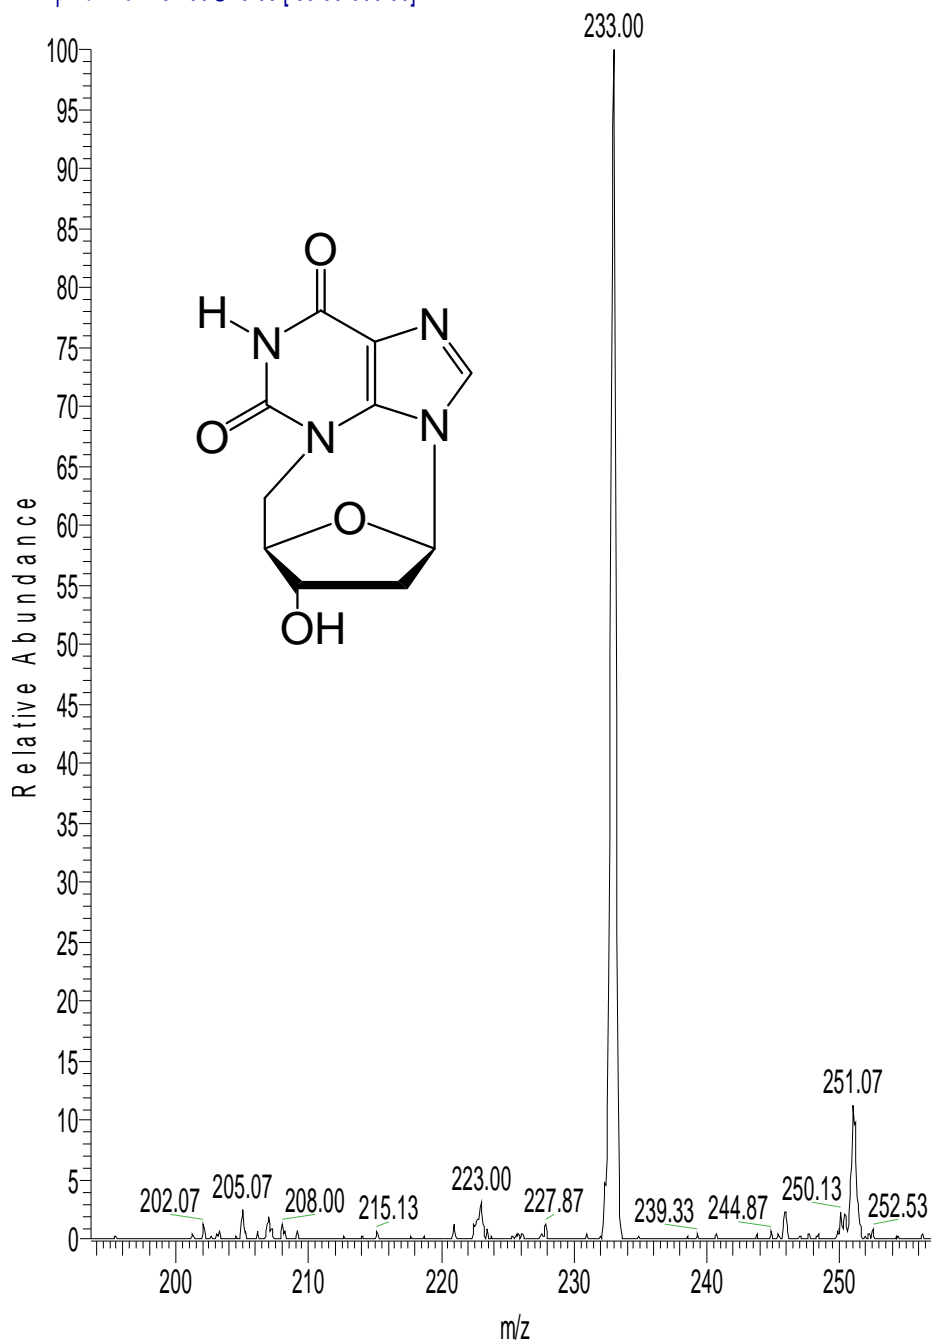

**Figure S38.** Cyclo-dX (**19**). The product ion spectrum of the  $(M+H)^+$  ion acquired with LTQ-FTMS.

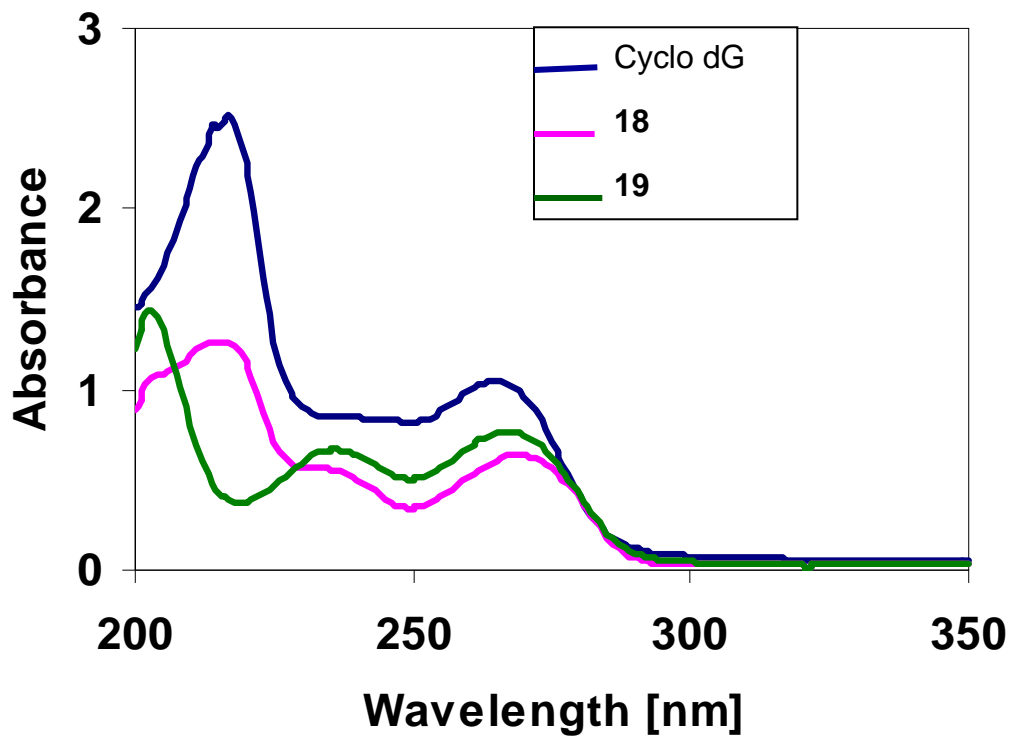

**Figure S39.** Comparison of UV of cyclo-dG (blue), acid intermediate **18** (pink), and cyclo-dX (**19**) (green).
